# Supplementary material for: Synthesis of CF3-Containing Spiro-[Indene-Proline] Derivatives via Rh(III)-Catalyzed C-H Activation/Annulation
Source: MDPI journal article supplement (doi:10.3390/molecules28237809), 2023-11-27
Supplement: s1 [file s1]

## Table of contents

|                                                                                |        |
|--------------------------------------------------------------------------------|--------|
| 1. $^1\text{H}$ , $^{19}\text{F}$ and $^{13}\text{C}$ NMR Spectra of Compounds | S2-S49 |
| 2. HPLC-HRMS data for <b>4a</b>                                                | S50    |

**$^1\text{H}$  NMR,  $^{19}\text{F}$  NMR and  $^{13}\text{C}$  NMR Spectra.**

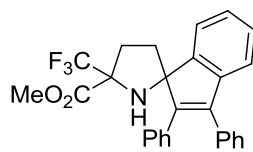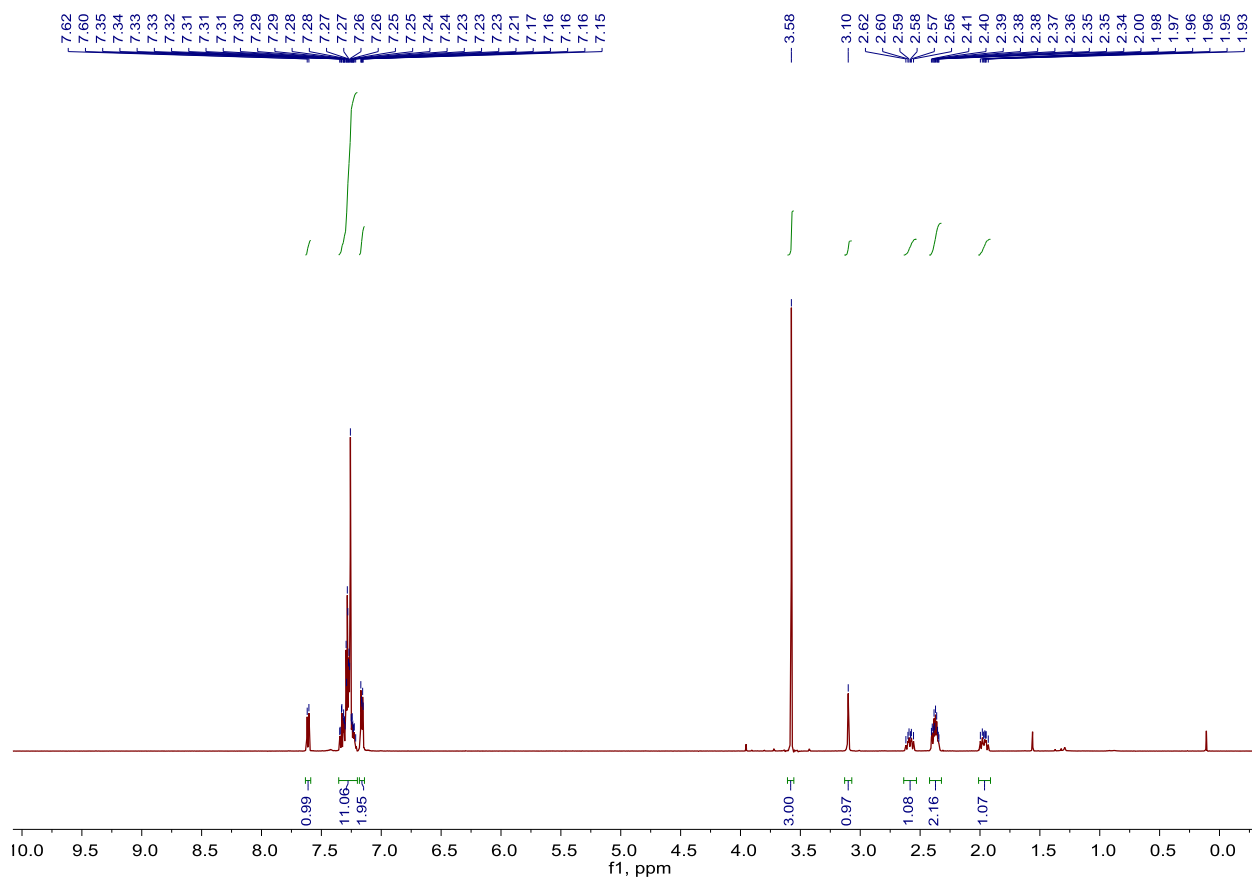

$^1\text{H}$  spectrum of **4a** in  $\text{CDCl}_3$

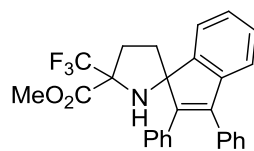

— -77.33

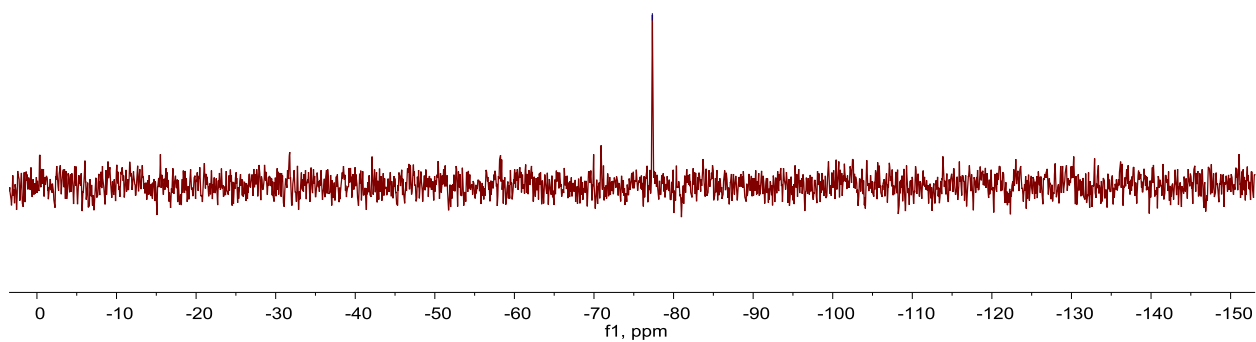

$^{19}\text{F}$  spectrum of **4a** in  $\text{CDCl}_3$

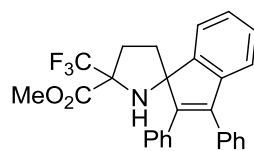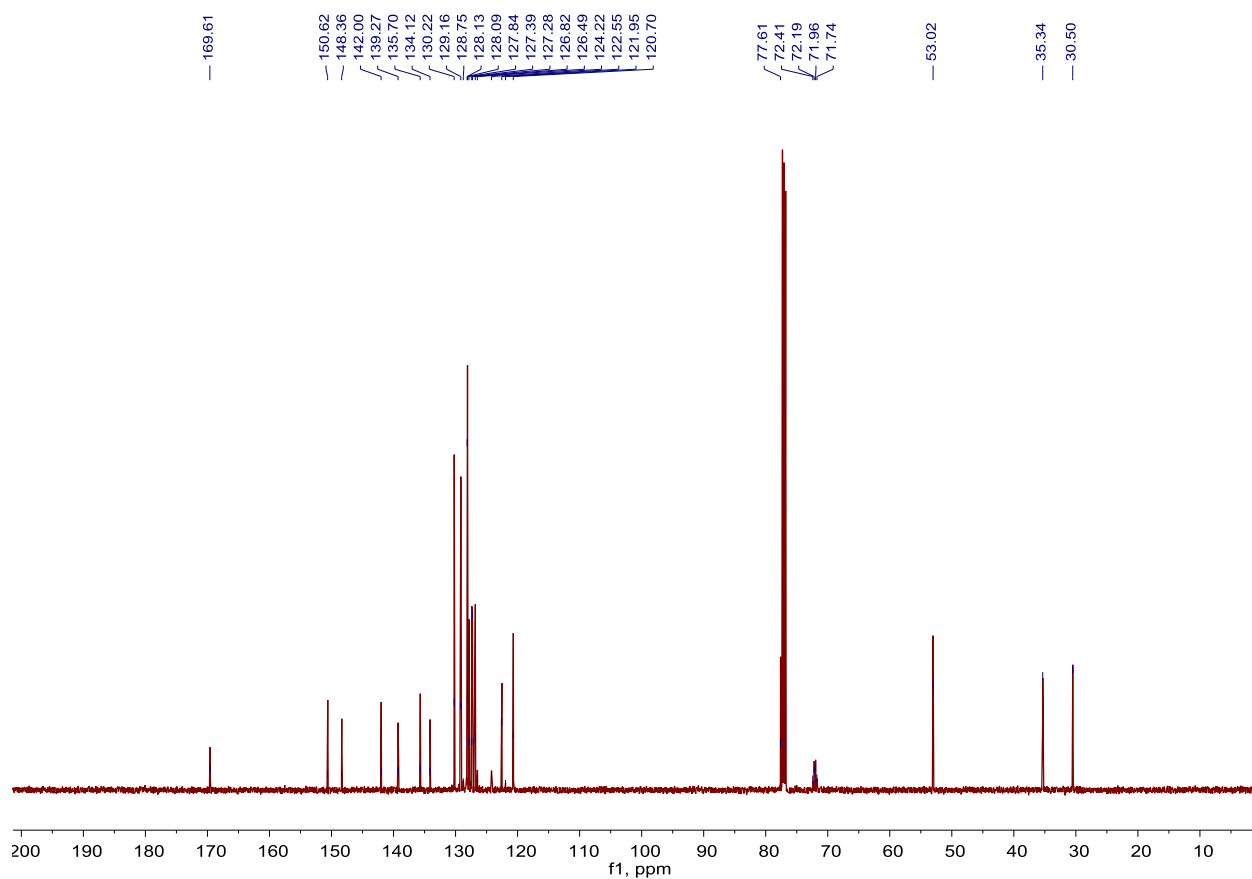

$^{13}\text{C}$  spectrum of **4a** in  $\text{CDCl}_3$

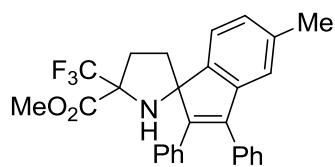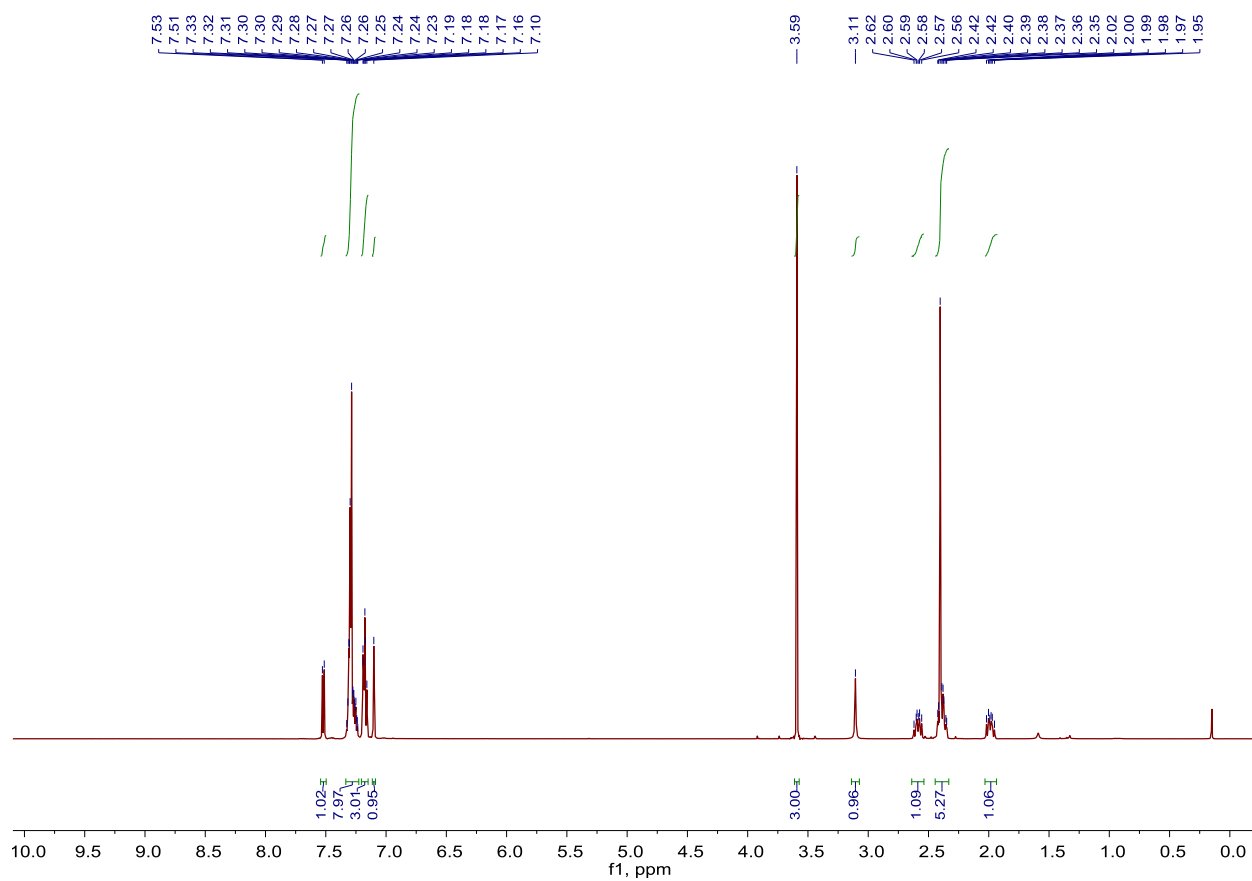

<sup>1</sup>H spectrum of **4b** in CDCl<sub>3</sub>

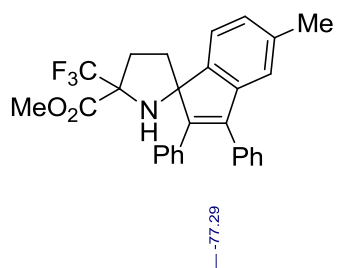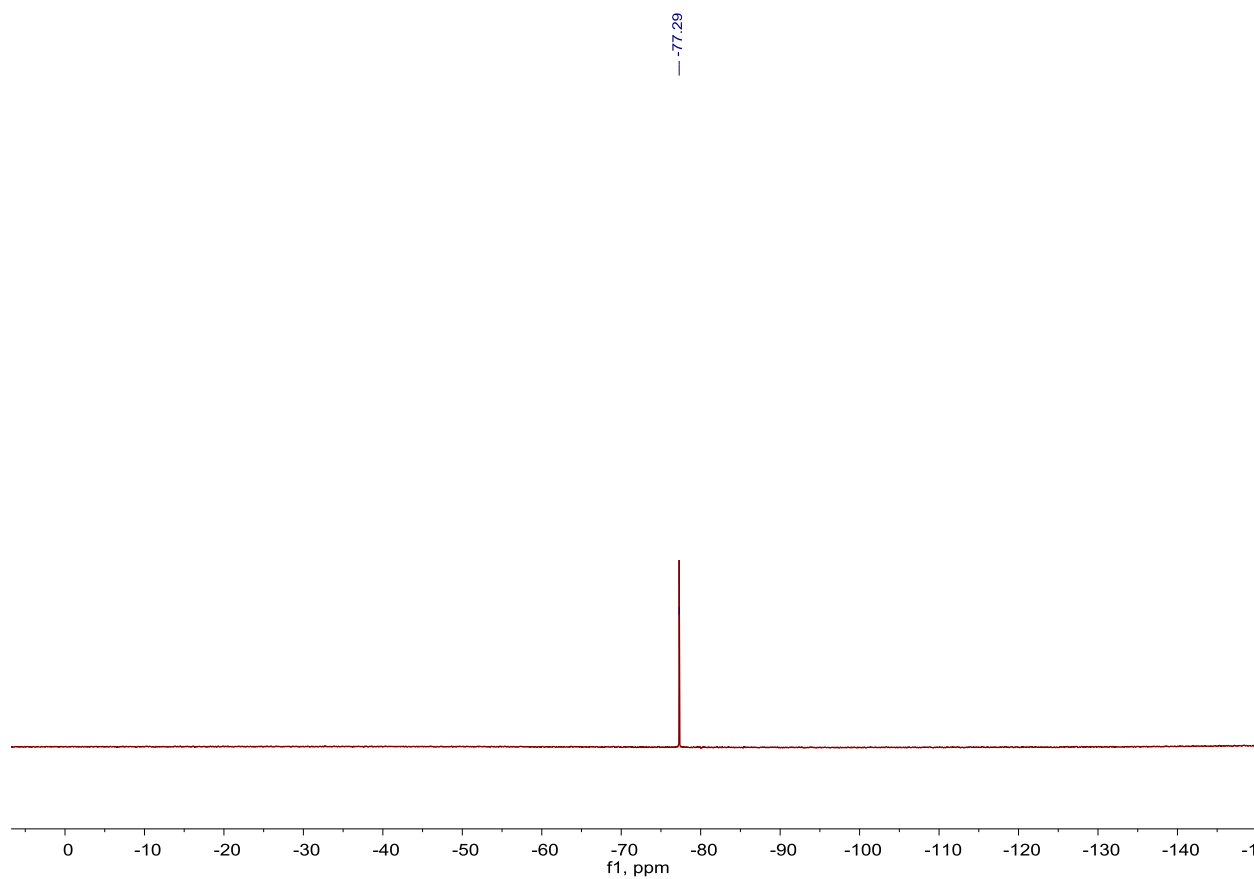

<sup>19</sup>F spectrum of **4b** in CDCl<sub>3</sub>

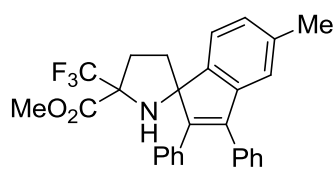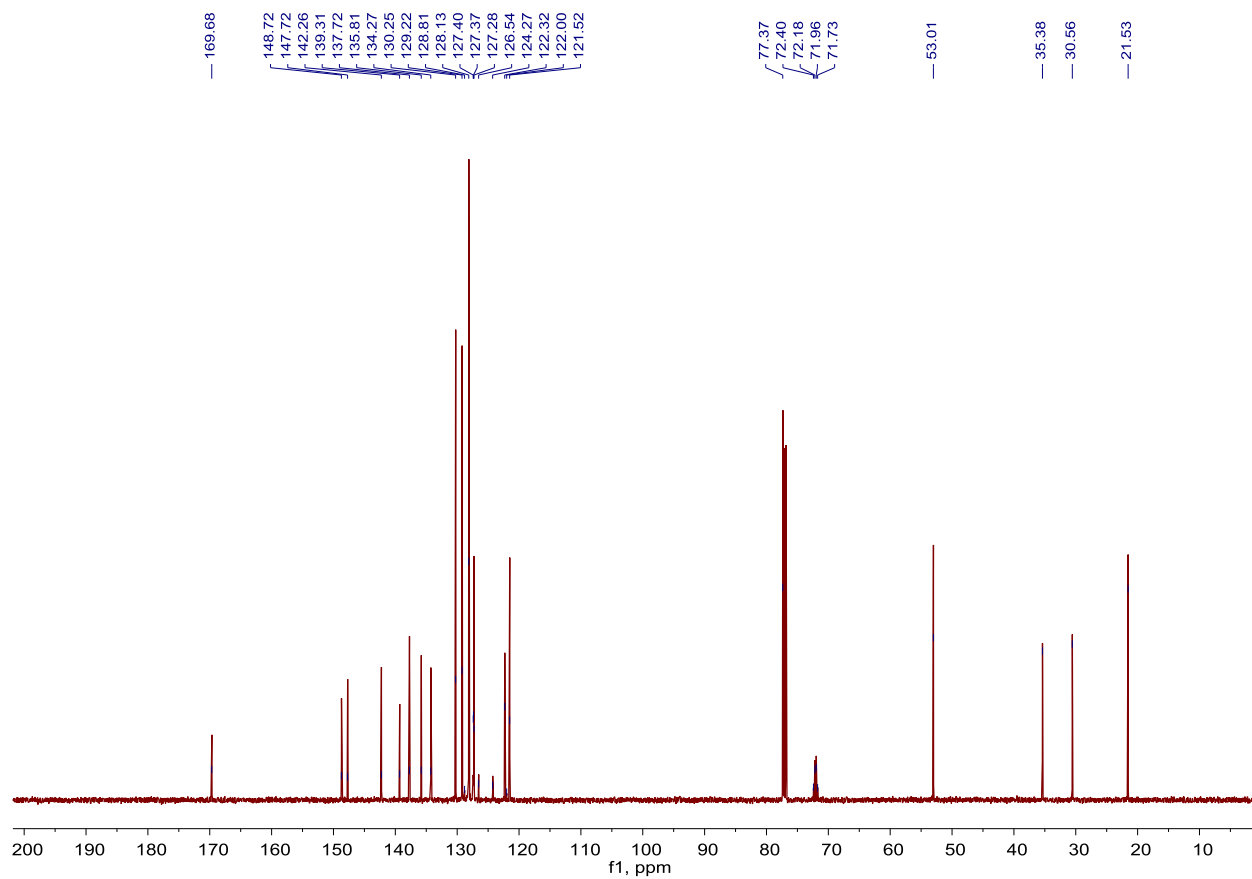

$^{13}\text{C}$  spectrum of **4b** in  $\text{CDCl}_3$

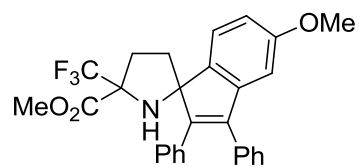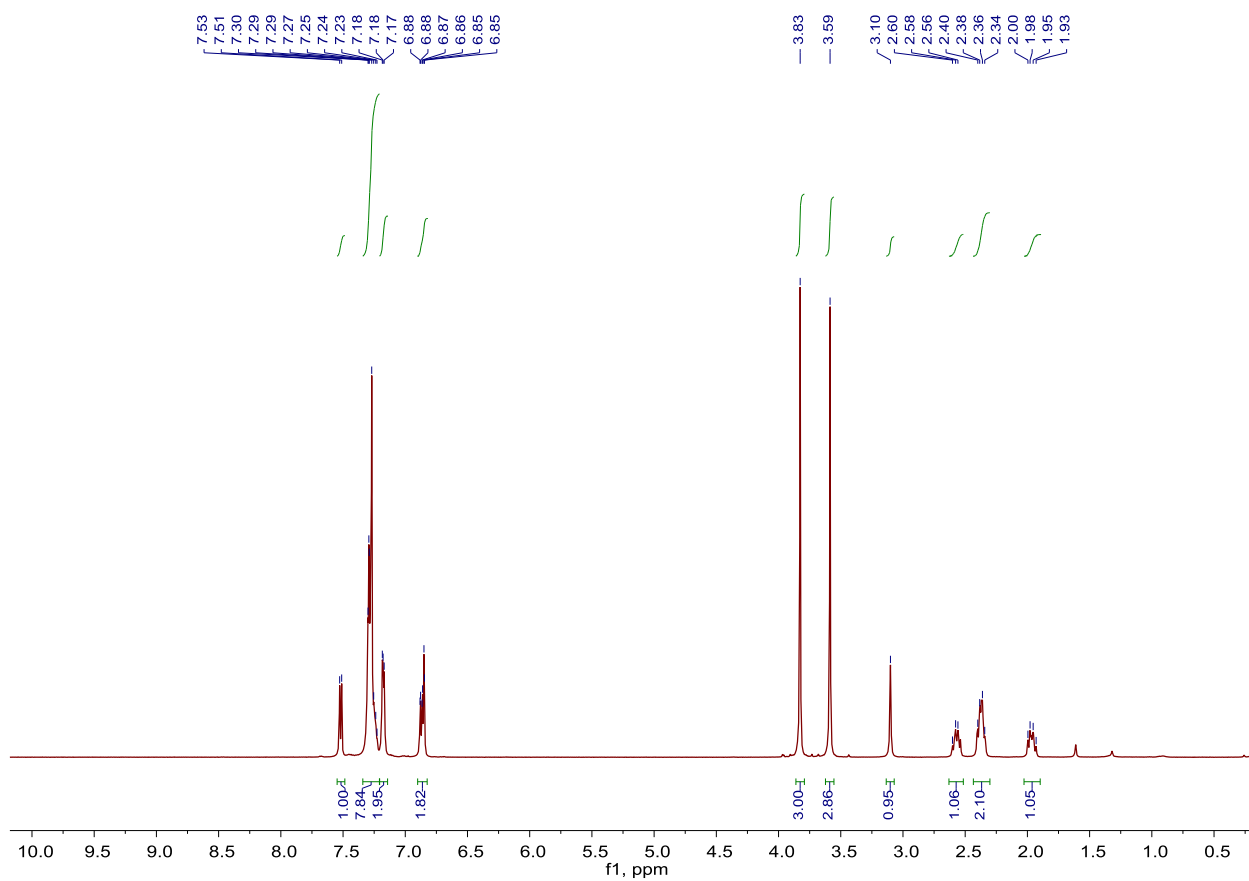

<sup>1</sup>H spectrum of **4c** in CDCl<sub>3</sub>

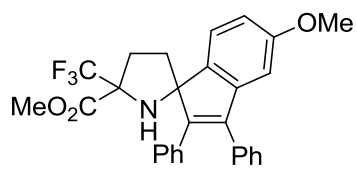

-77.29

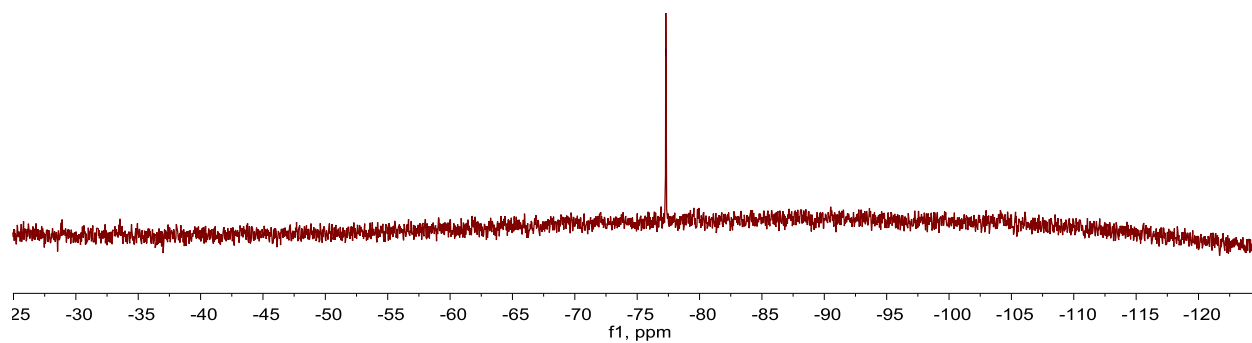

$^{19}\text{F}$  spectrum of **4c** in  $\text{CDCl}_3$

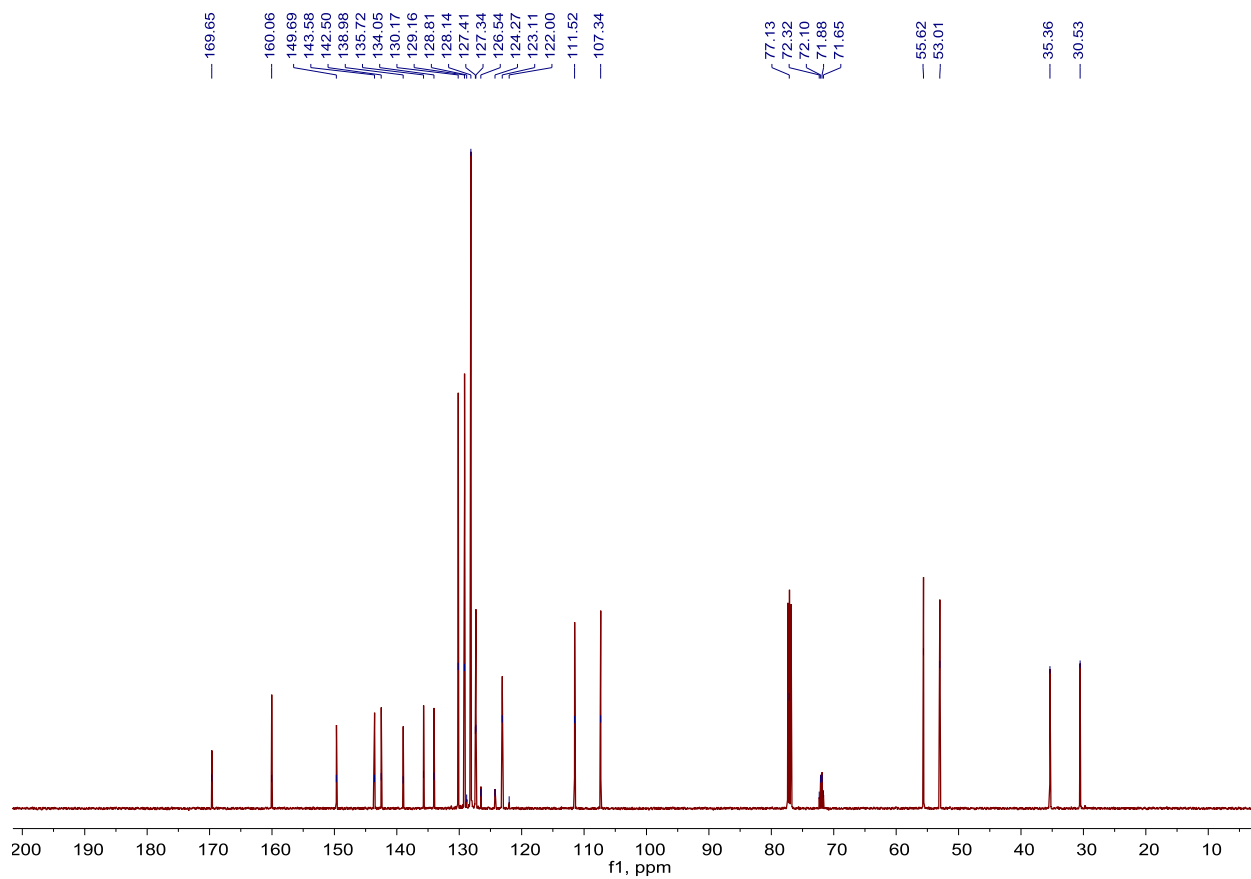

$^{13}\text{C}$  spectrum of **4c** in  $\text{CDCl}_3$

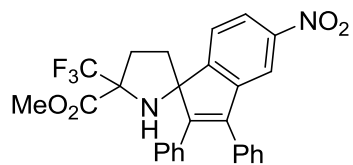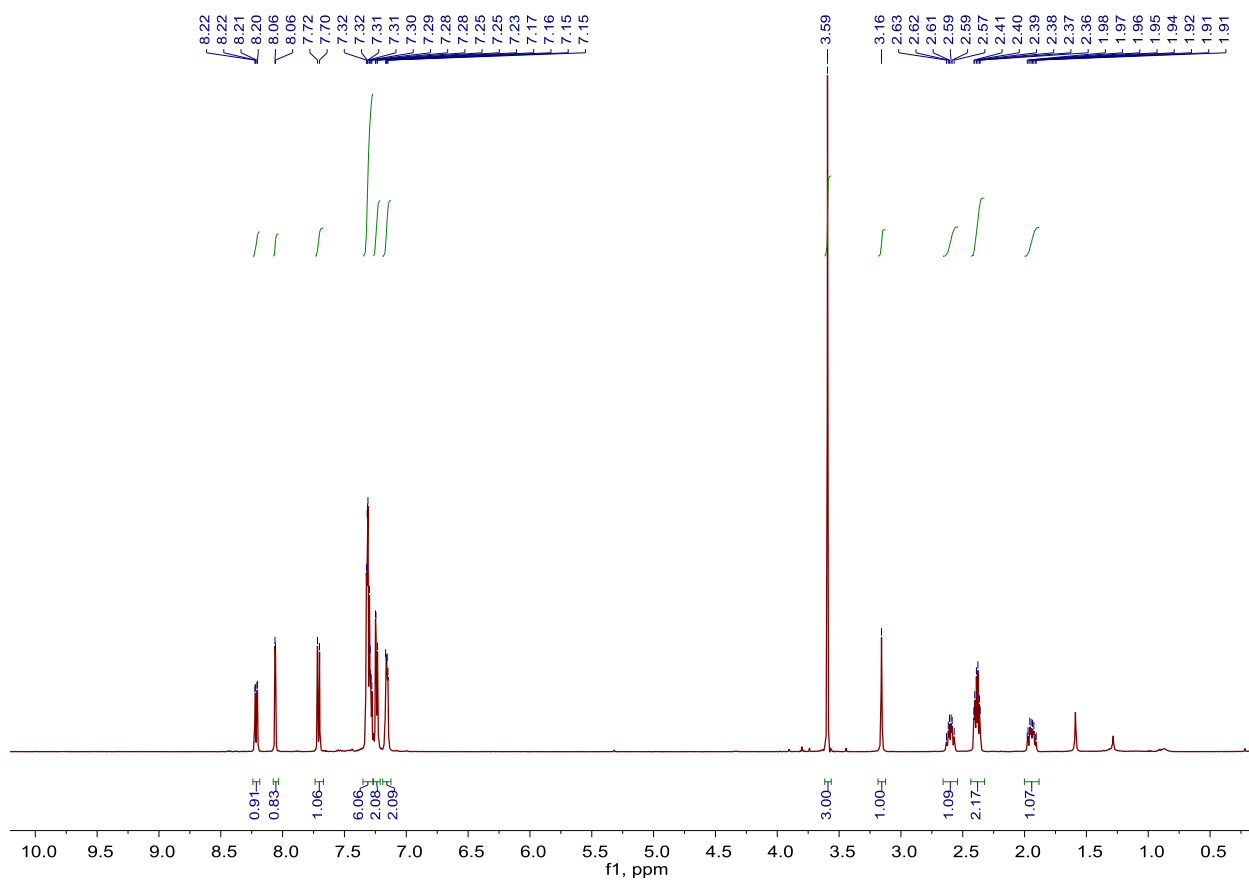

<sup>1</sup>H spectrum of **4d** in CDCl<sub>3</sub>

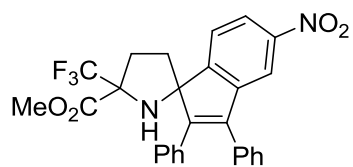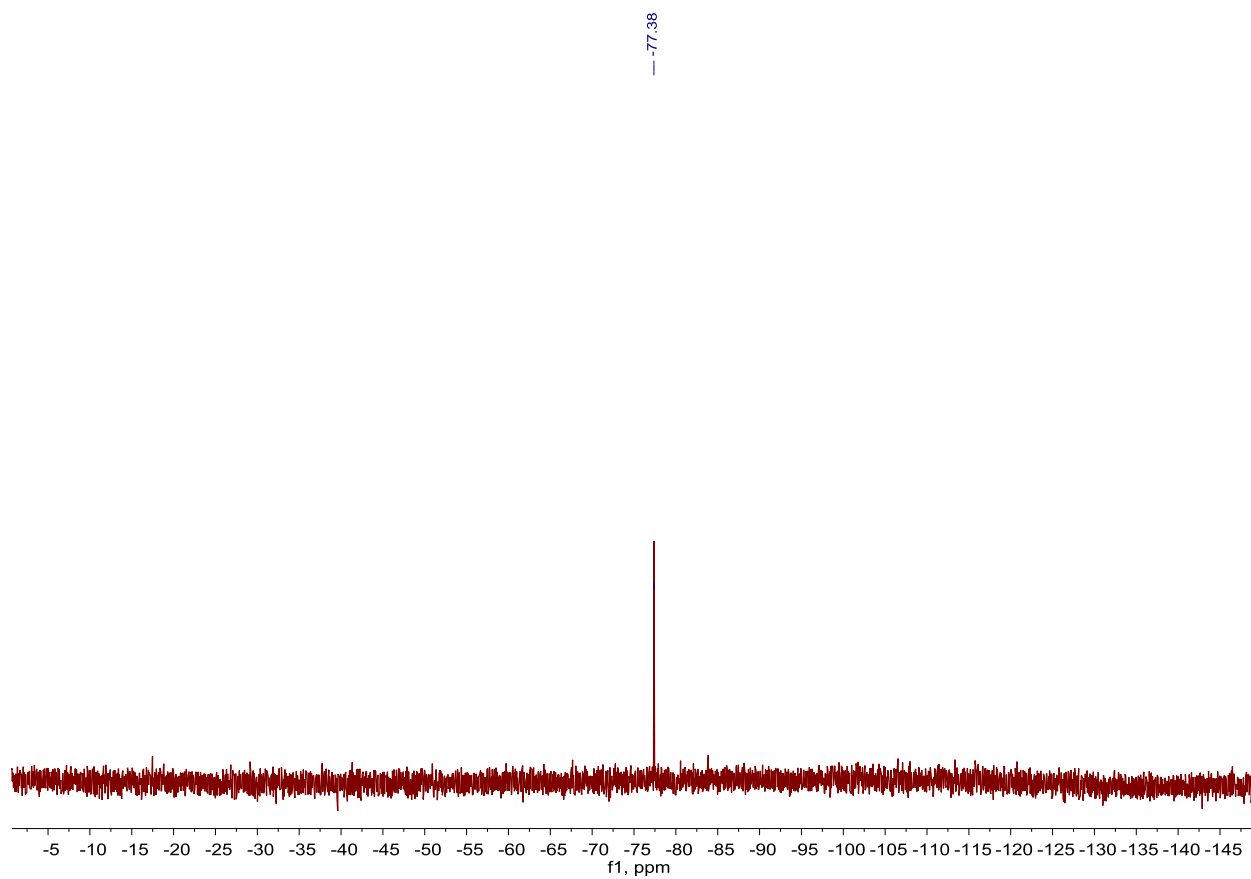

$^{19}\text{F}$  spectrum of **4d** in  $\text{CDCl}_3$

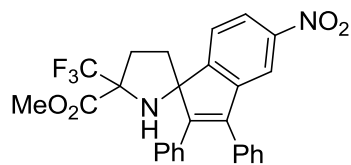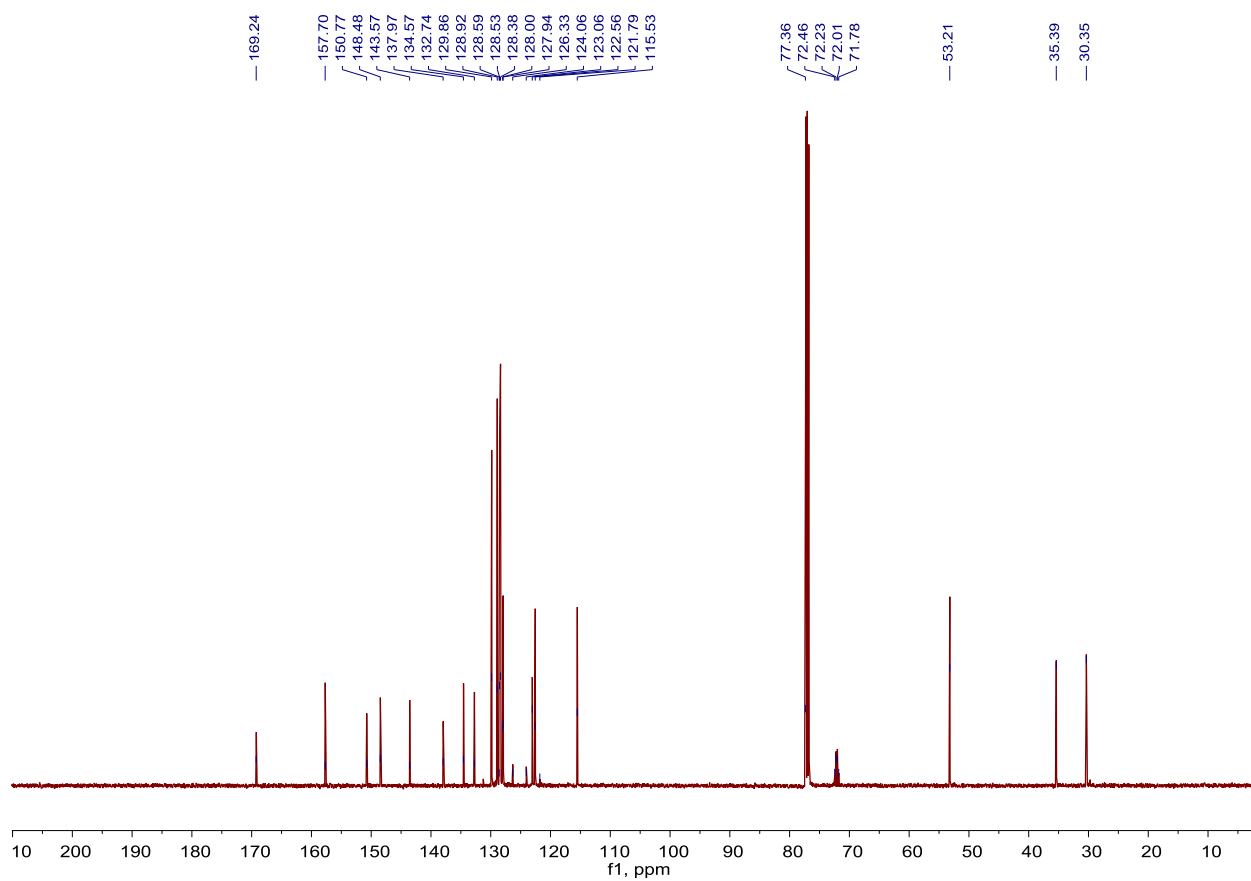

$^{13}\text{C}$  spectrum of **4d** in  $\text{CDCl}_3$

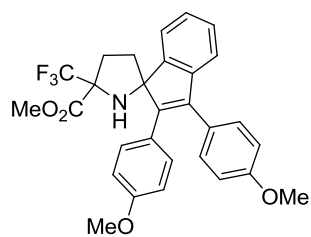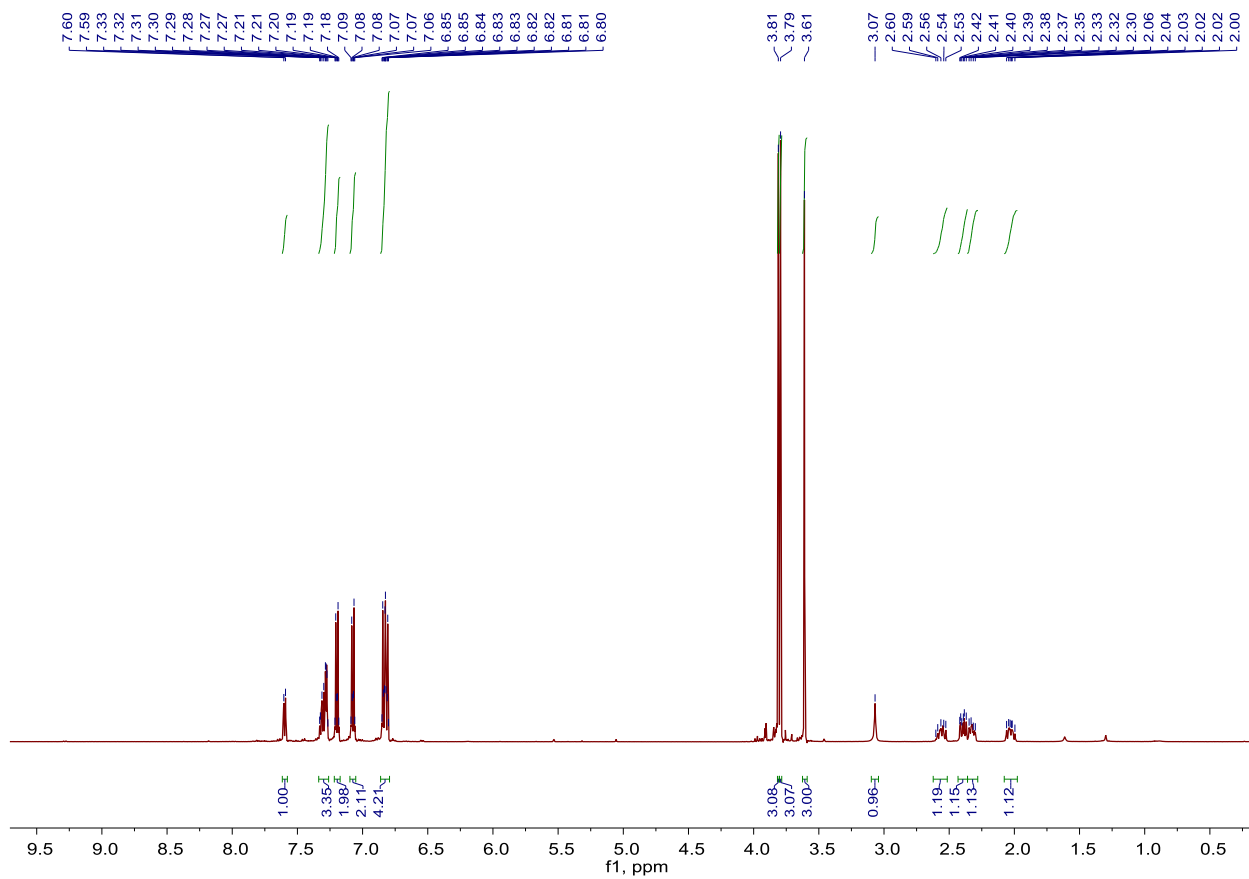

<sup>1</sup>H spectrum of **4e** in CDCl<sub>3</sub>

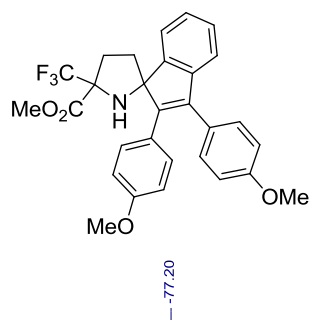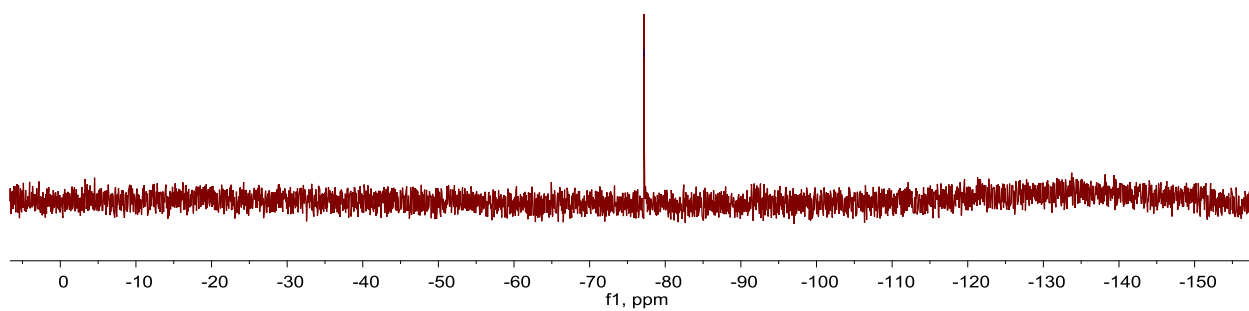

$^{19}\text{F}$  spectrum of **4e** in  $\text{CDCl}_3$

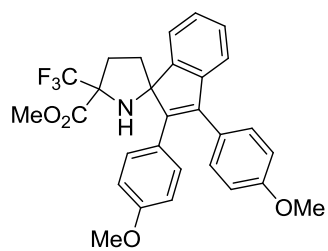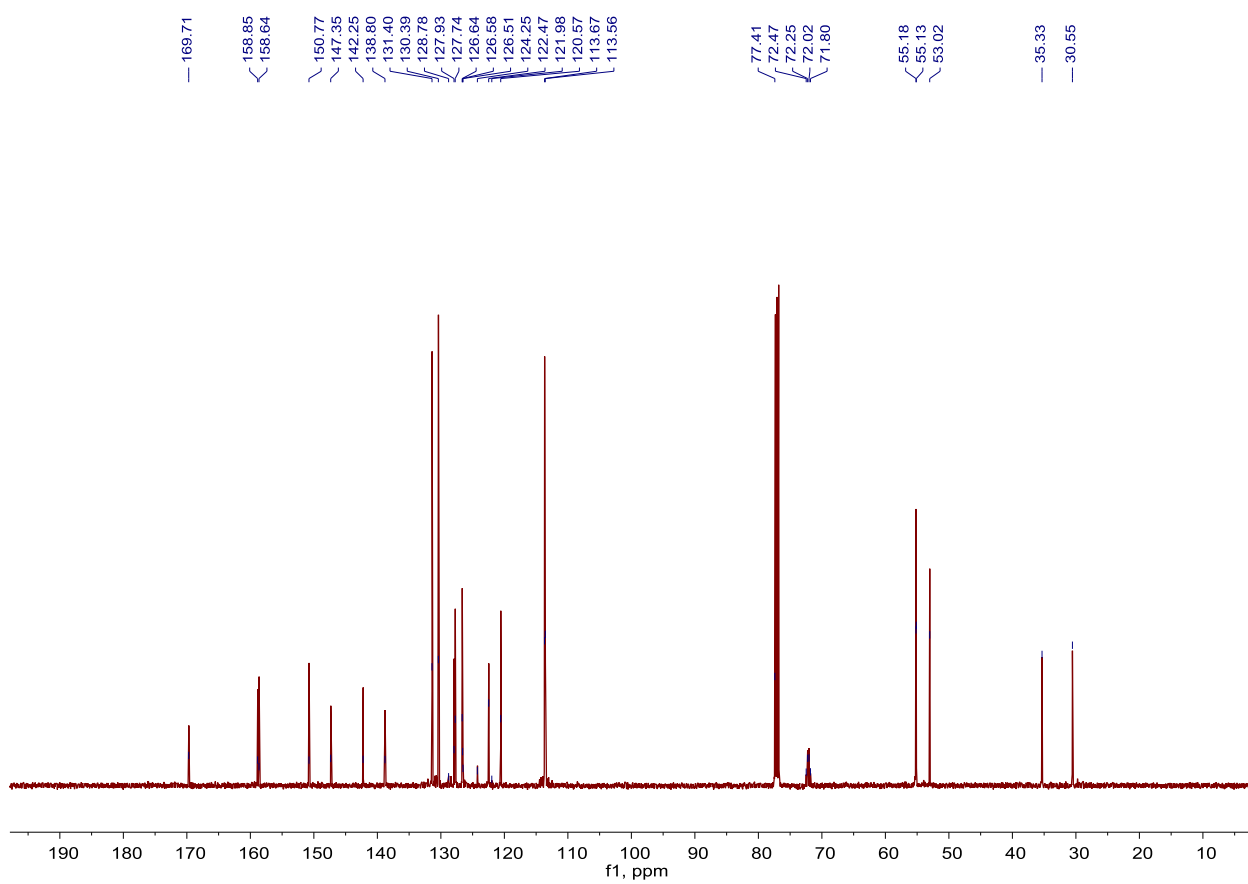

$^{13}\text{C}$  spectrum of **4e** in  $\text{CDCl}_3$

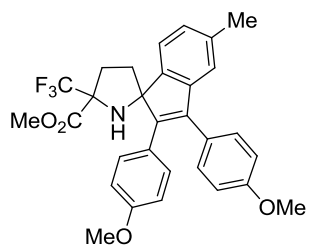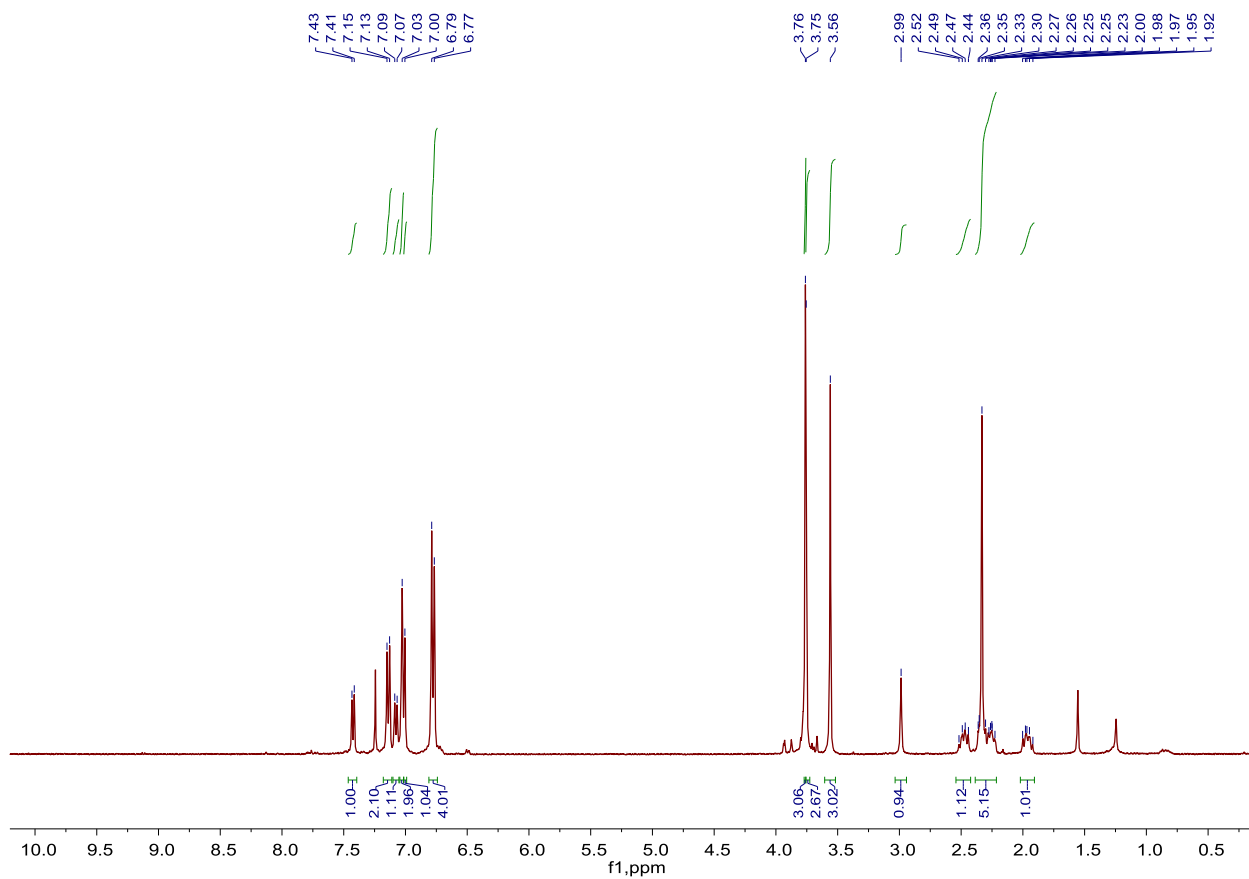

$^1\text{H}$  spectrum of **4f** in  $\text{CDCl}_3$

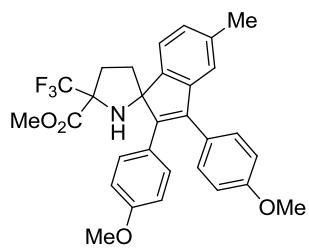

-77.17

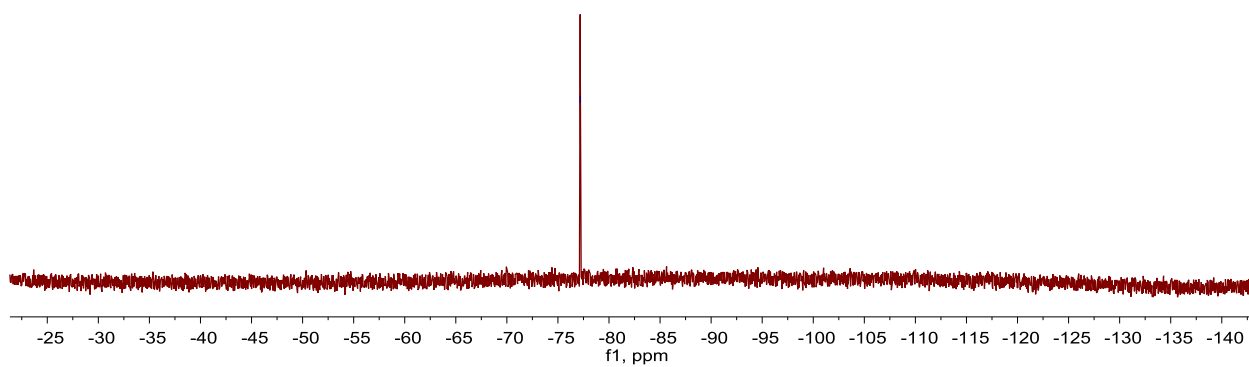

$^{19}\text{F}$  spectrum of **4f** in  $\text{CDCl}_3$

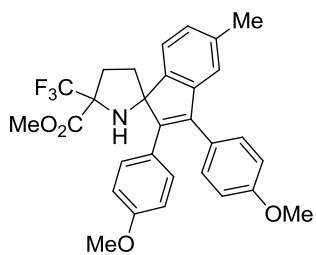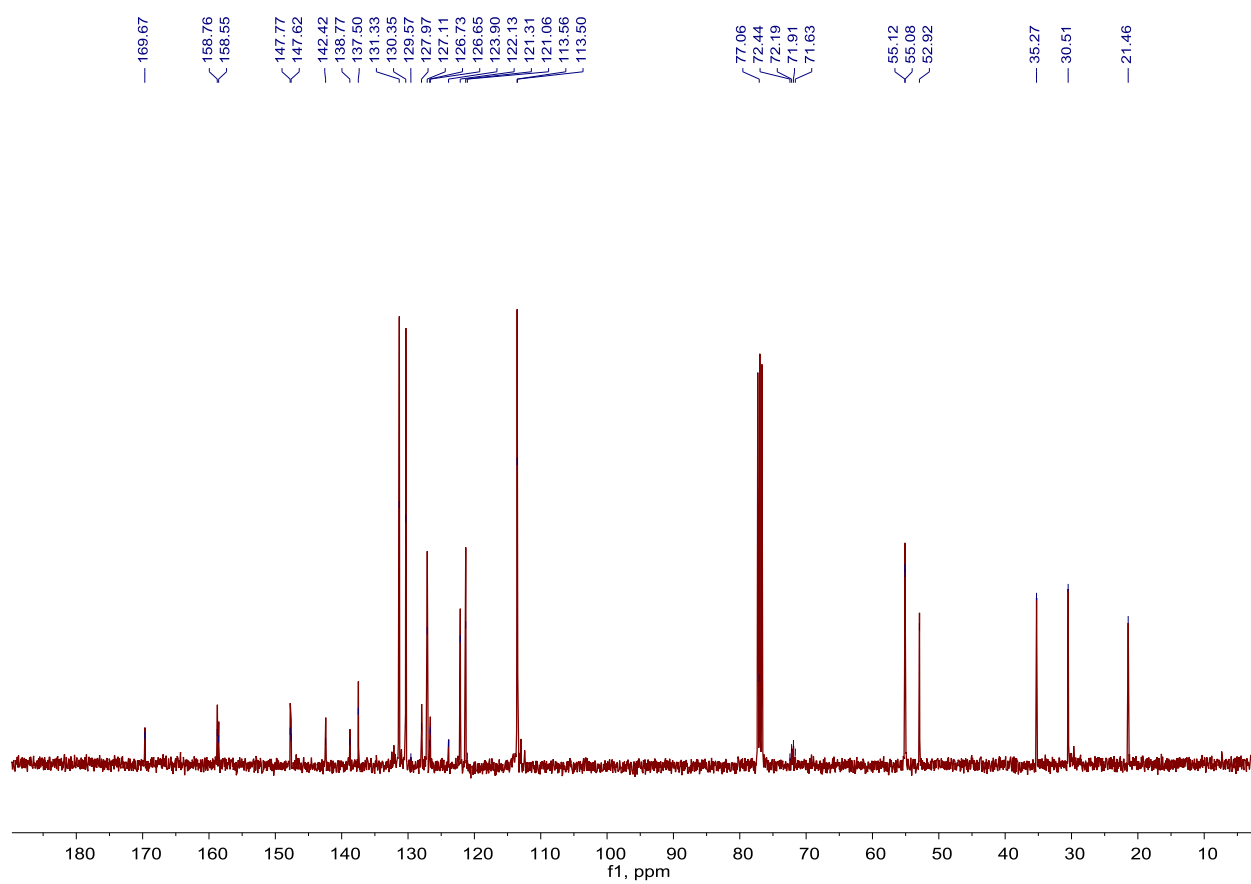

$^{13}\text{C}$  spectrum of **4f** in  $\text{CDCl}_3$

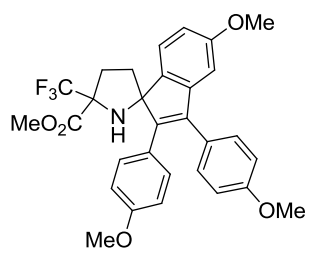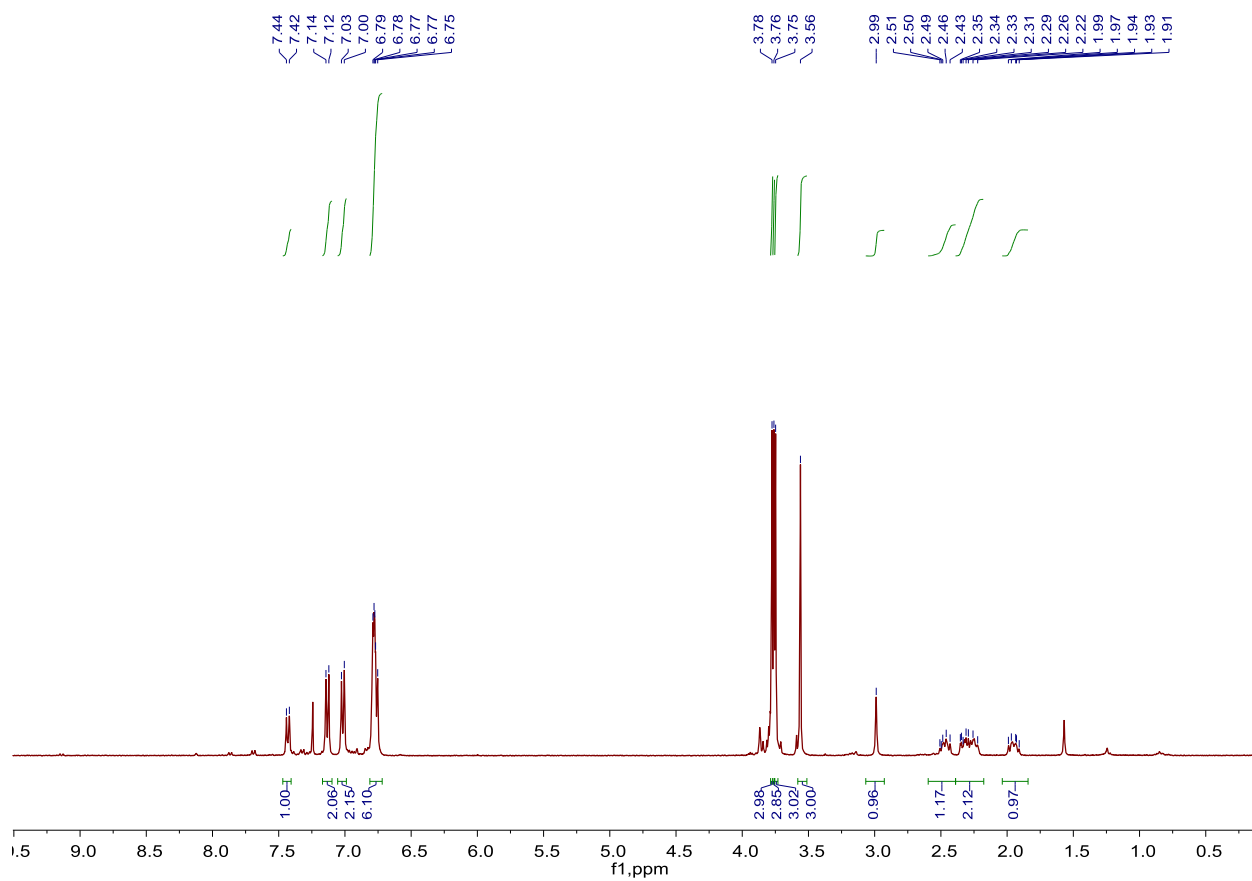

<sup>1</sup>H spectrum of **4g** in CDCl<sub>3</sub>



— -77.19

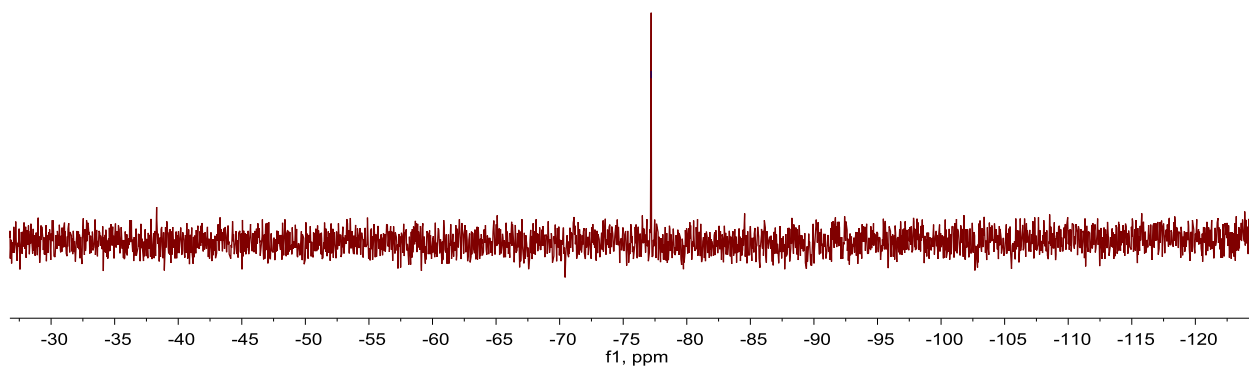

$^{19}\text{F}$  spectrum of **4g** in  $\text{CDCl}_3$

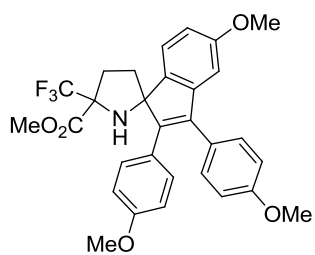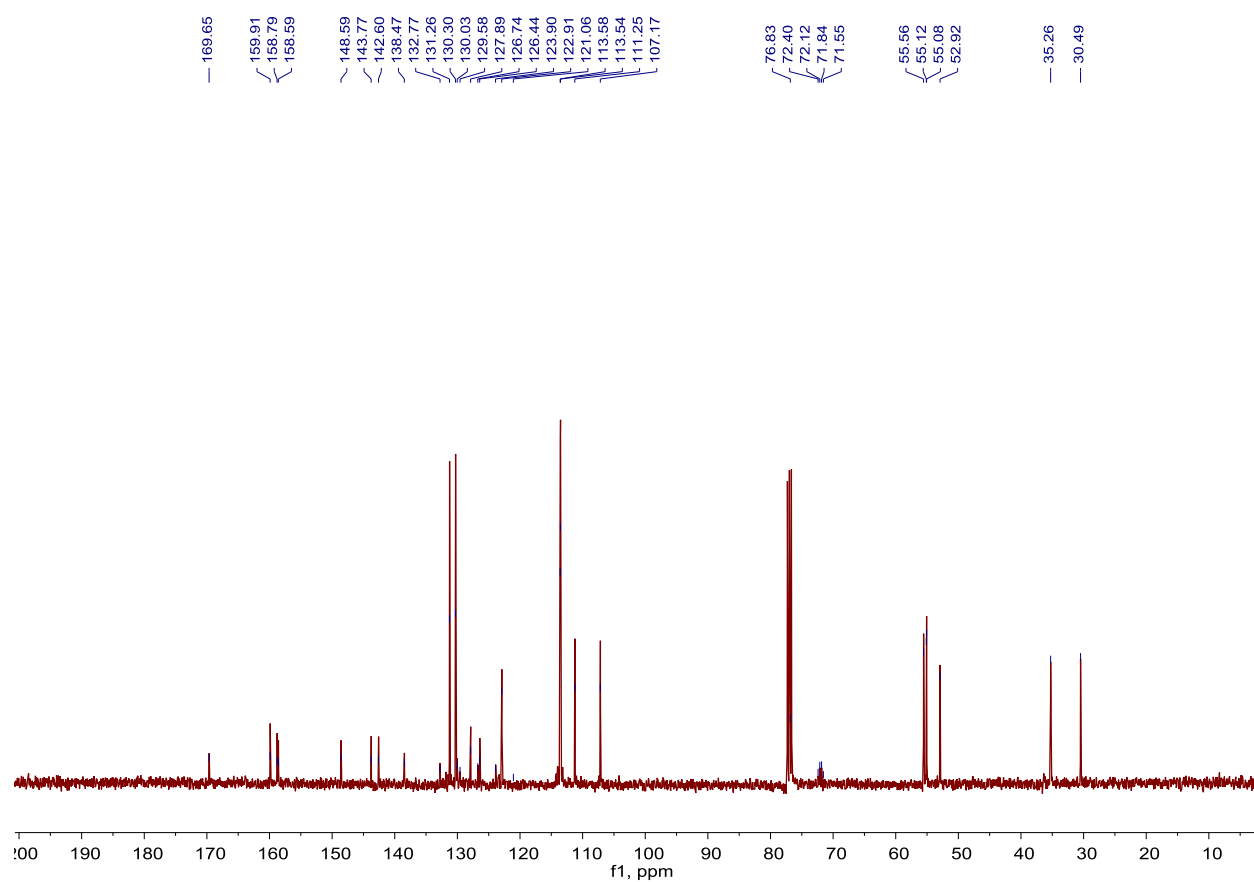

$^{13}\text{C}$  spectrum of **4g** in  $\text{CDCl}_3$

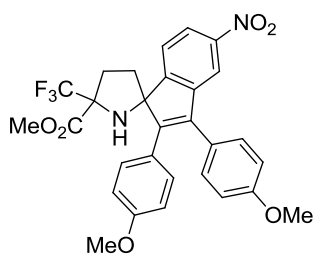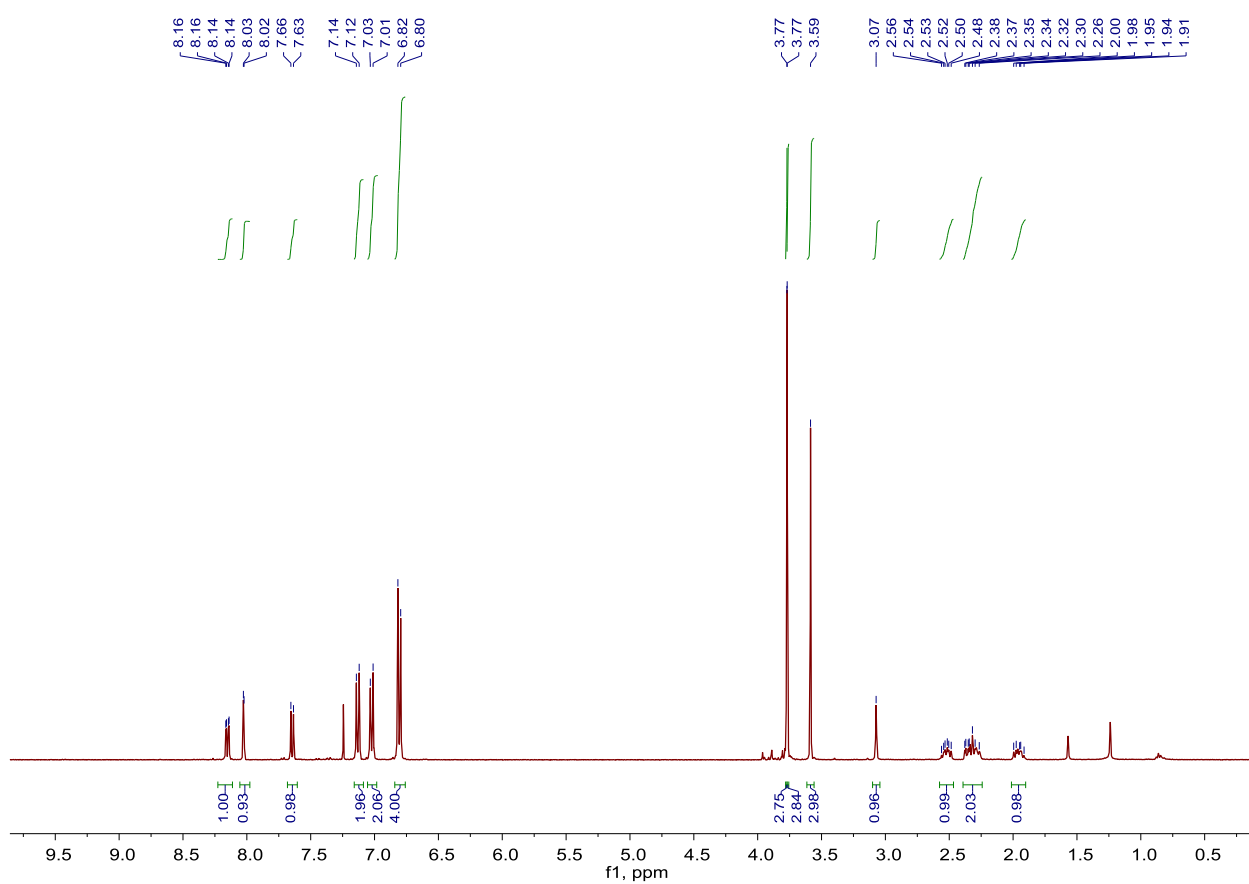

<sup>1</sup>H spectrum of **4h** in CDCl<sub>3</sub>

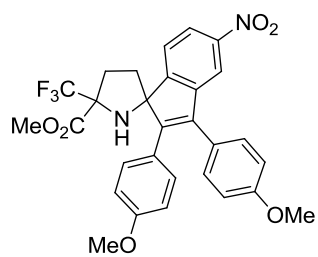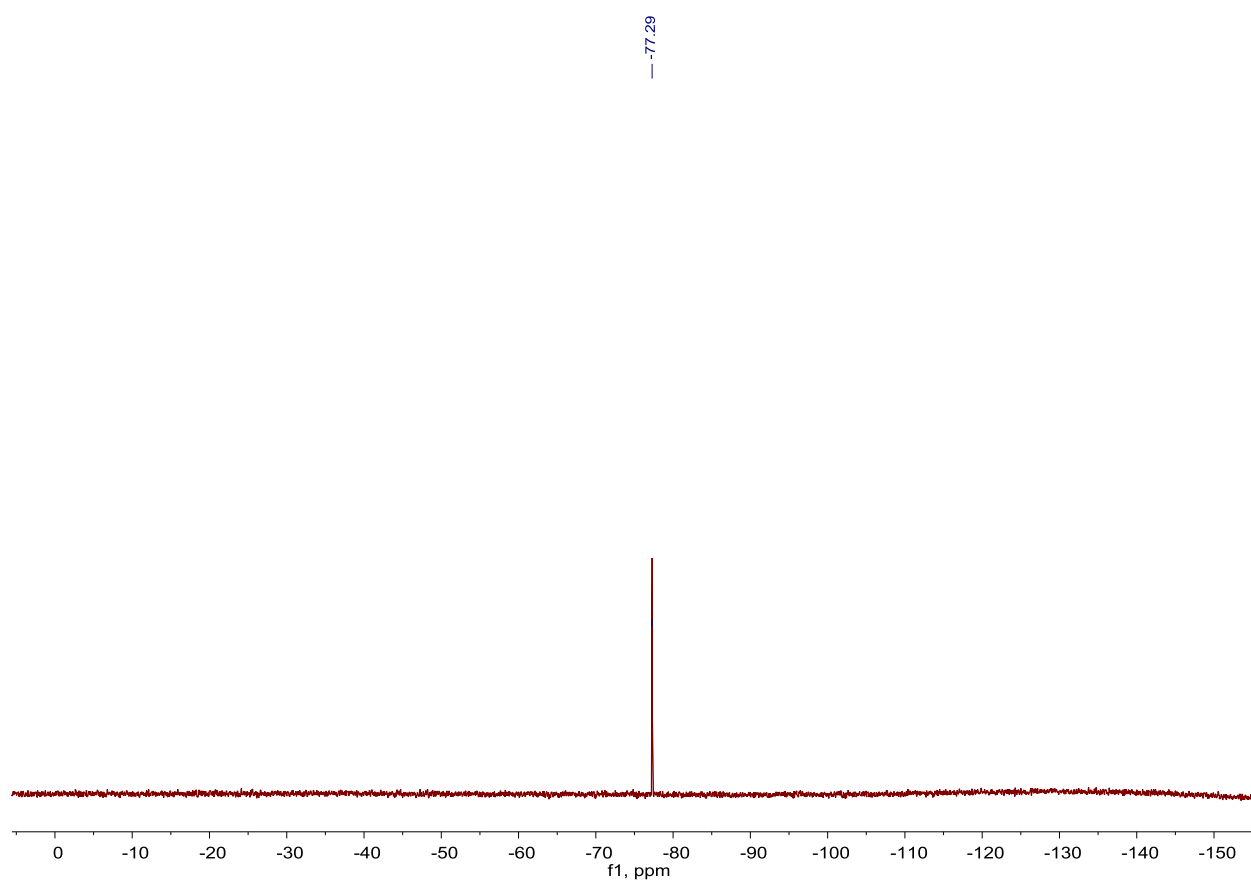

$^{19}\text{F}$  spectrum of **4h** in  $\text{CDCl}_3$

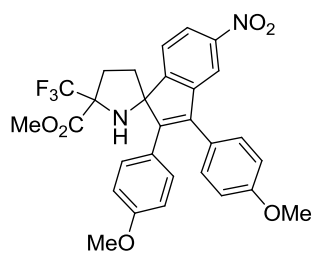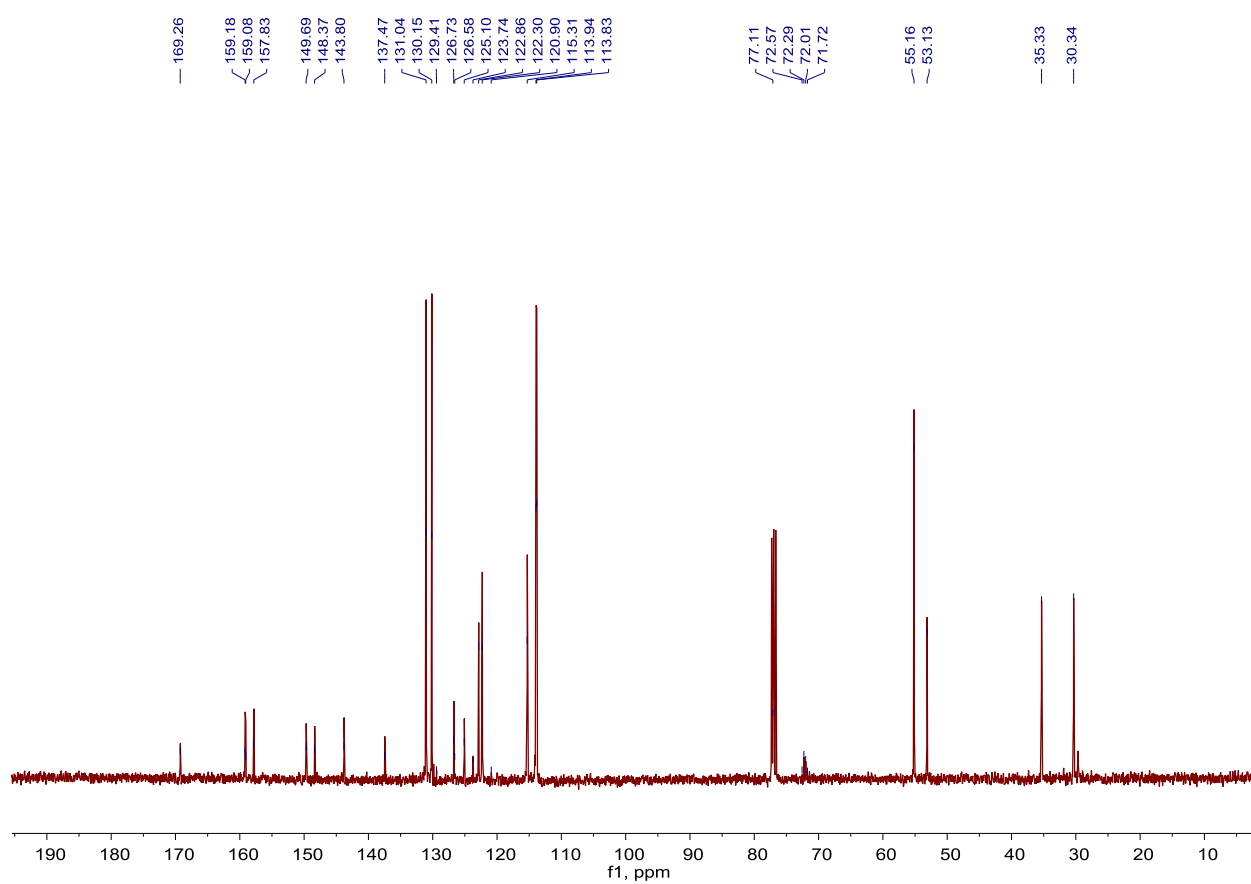

$^{13}\text{C}$  spectrum of **4h** in  $\text{CDCl}_3$

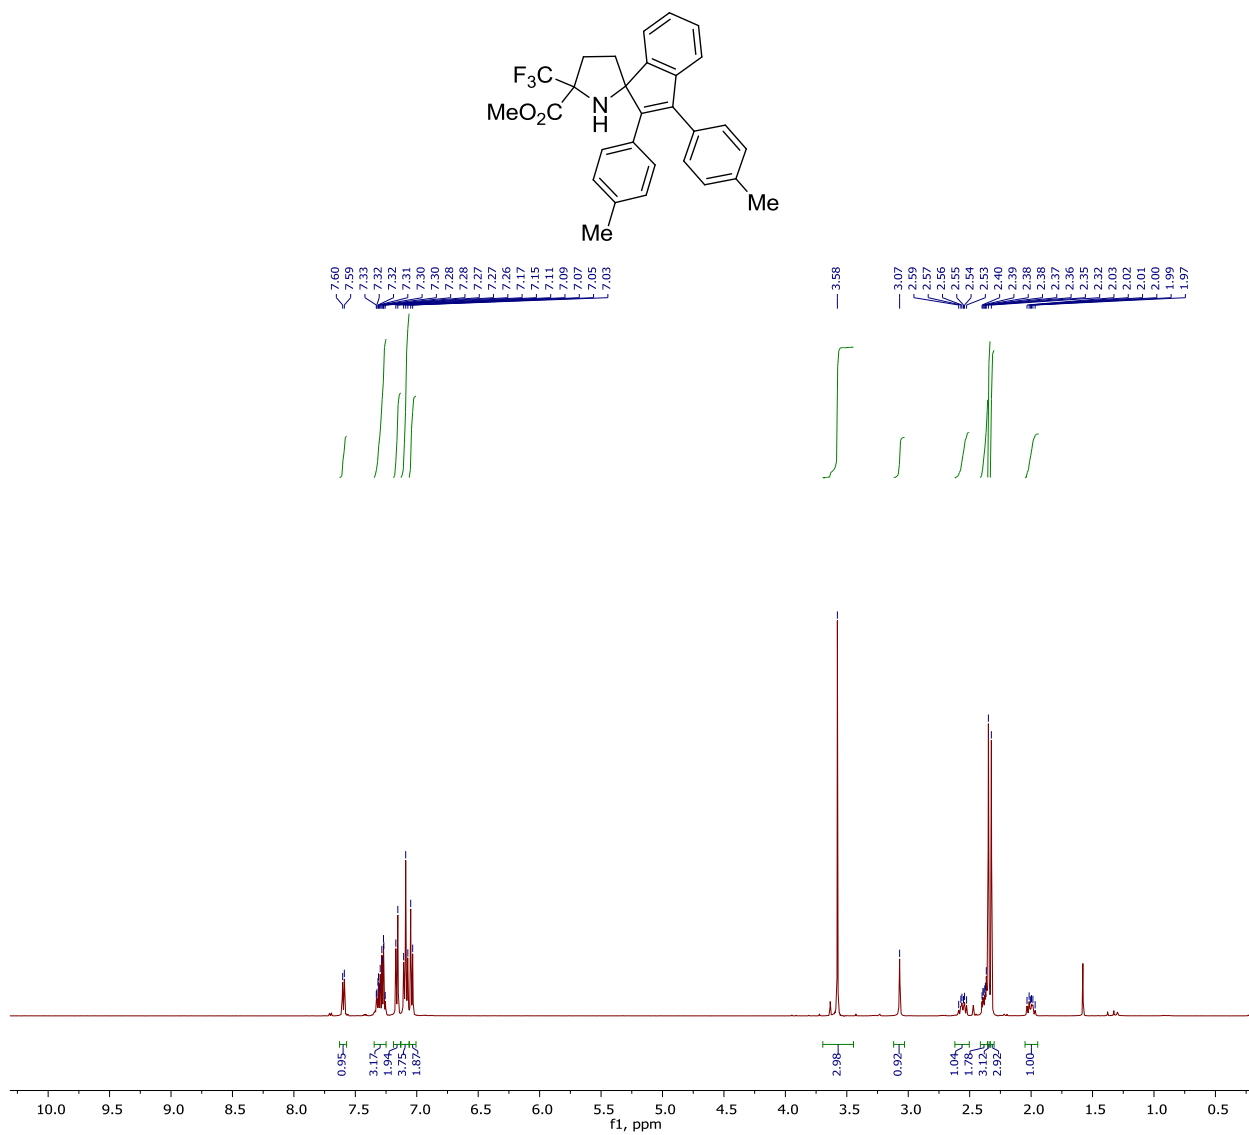

$^1\text{H}$  spectrum of **4i** in  $\text{CDCl}_3$

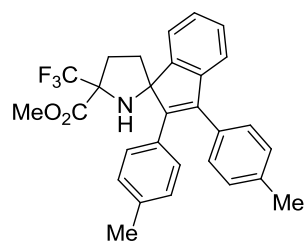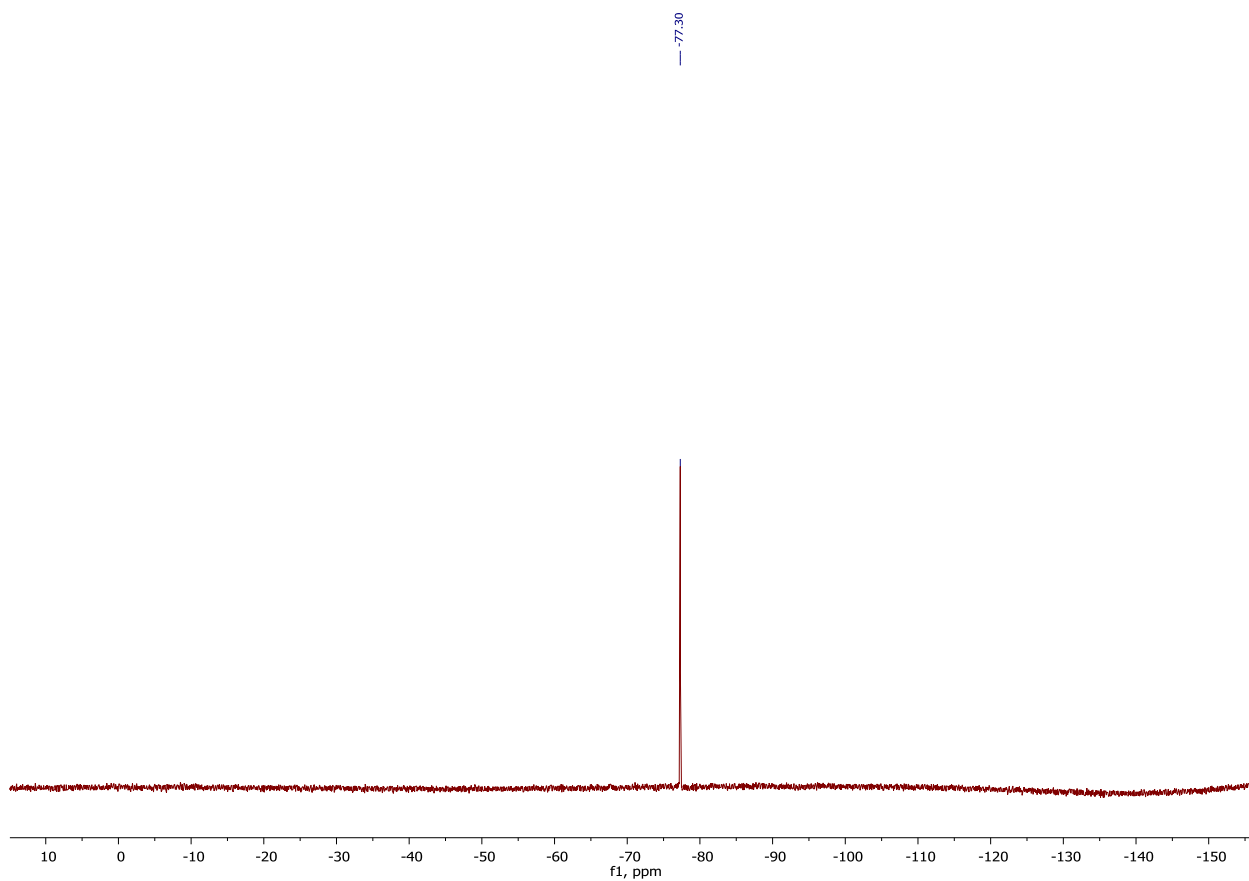

$^{19}\text{F}$  spectrum of **4i** in  $\text{CDCl}_3$

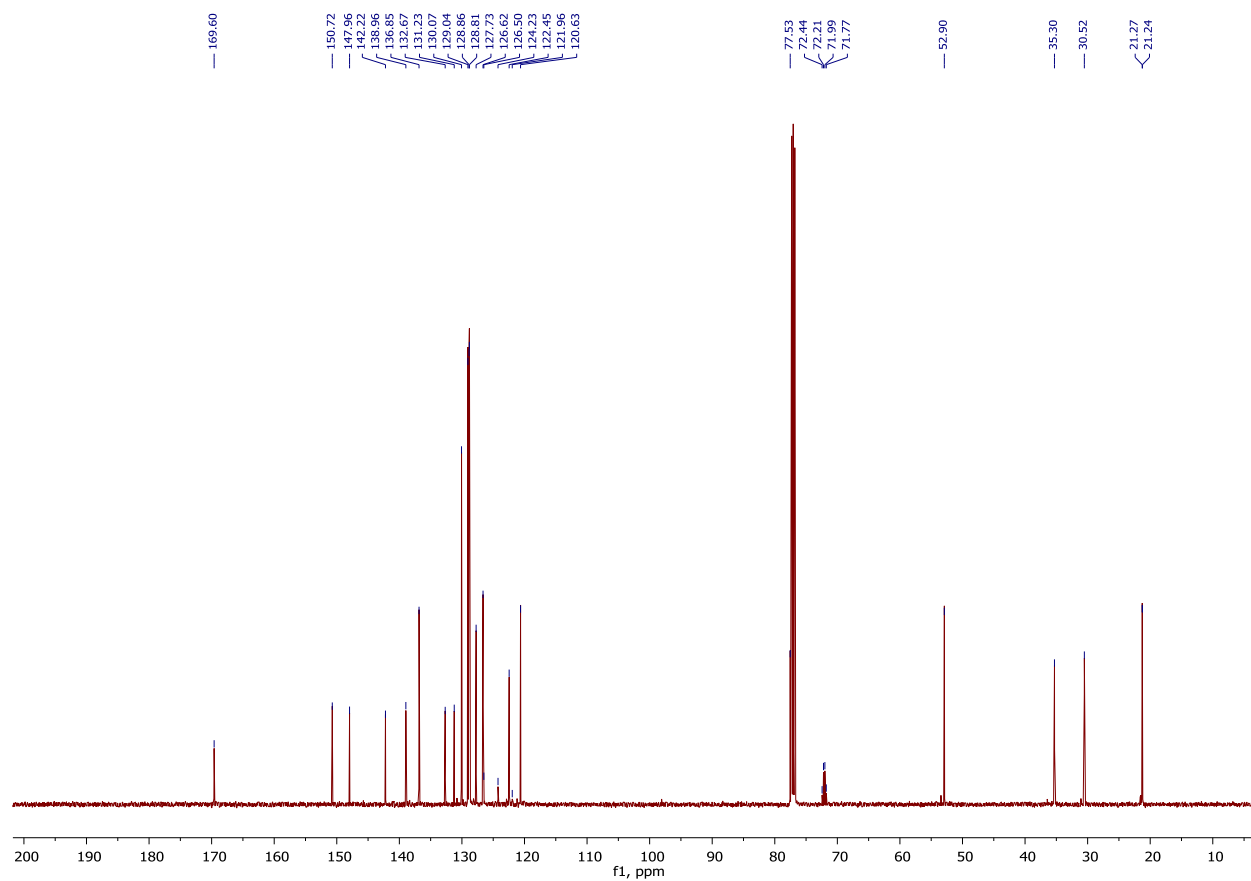

$^{13}\text{C}$  spectrum of **4i** in  $\text{CDCl}_3$

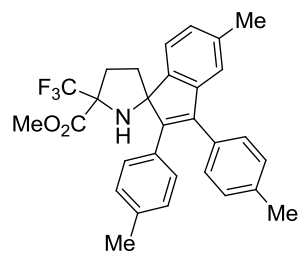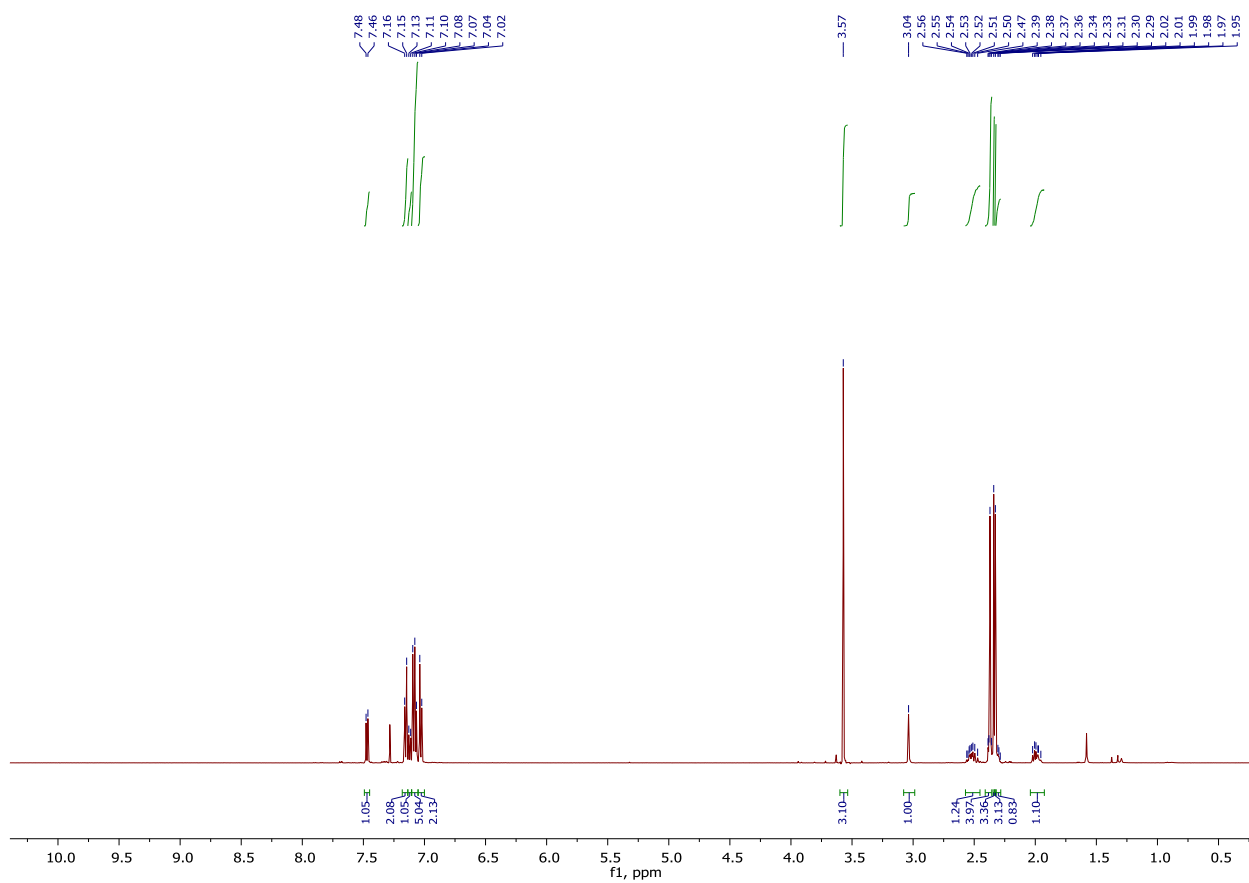

<sup>1</sup>H spectrum of **4j** in CDCl<sub>3</sub>

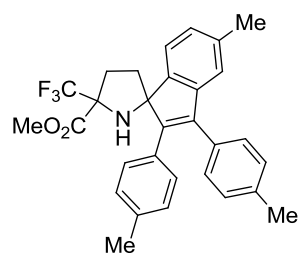

— -77.28

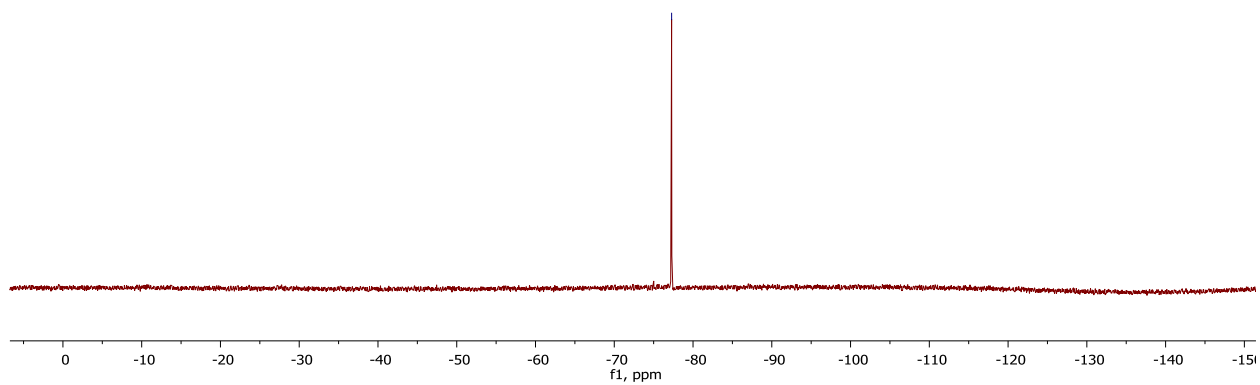

$^{19}\text{F}$  spectrum of **4j** in  $\text{CDCl}_3$

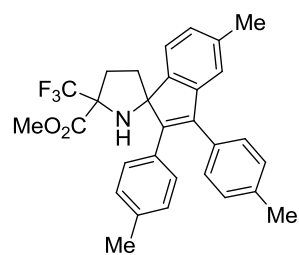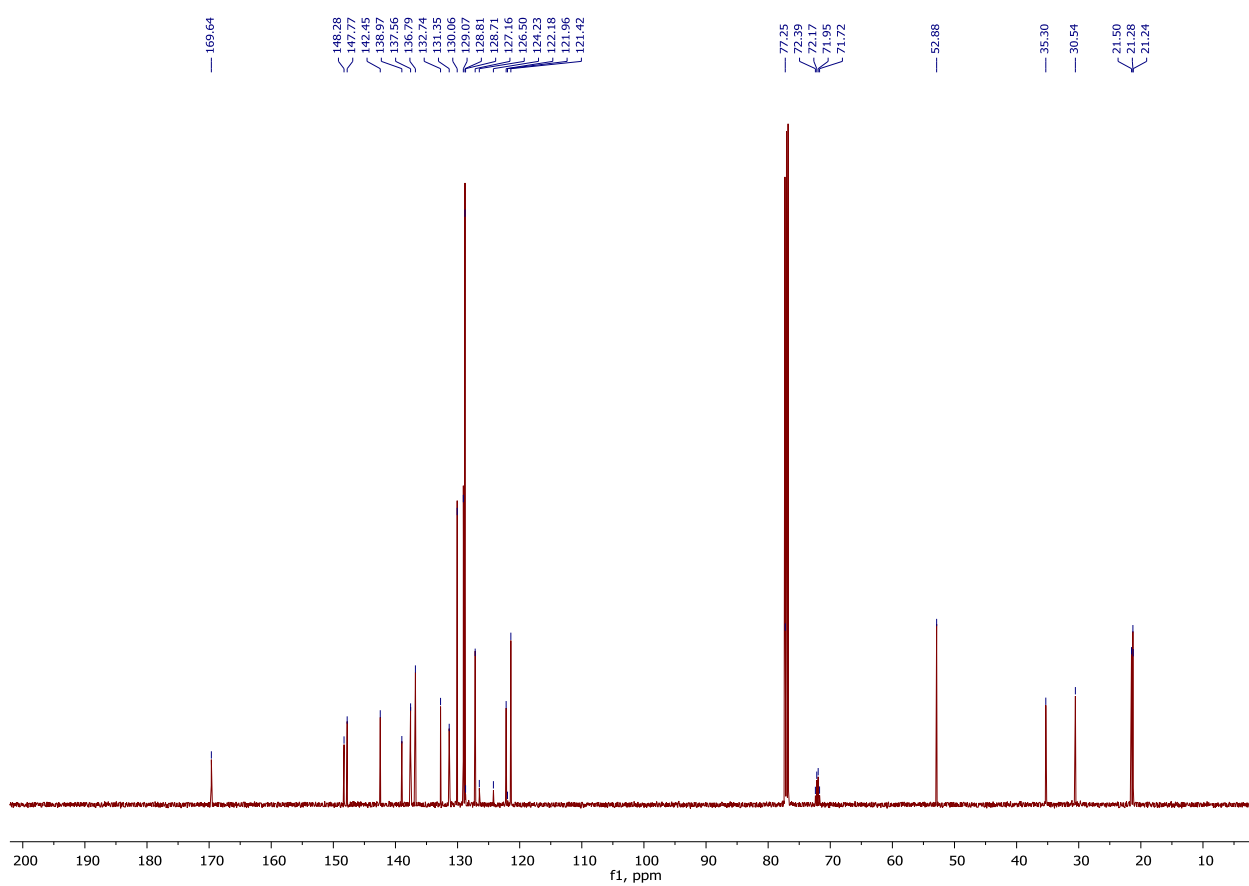

$^{13}\text{C}$  spectrum of **4j** in  $\text{CDCl}_3$

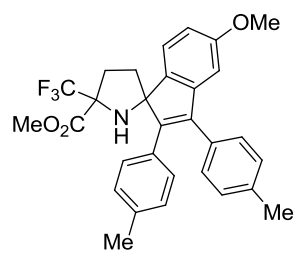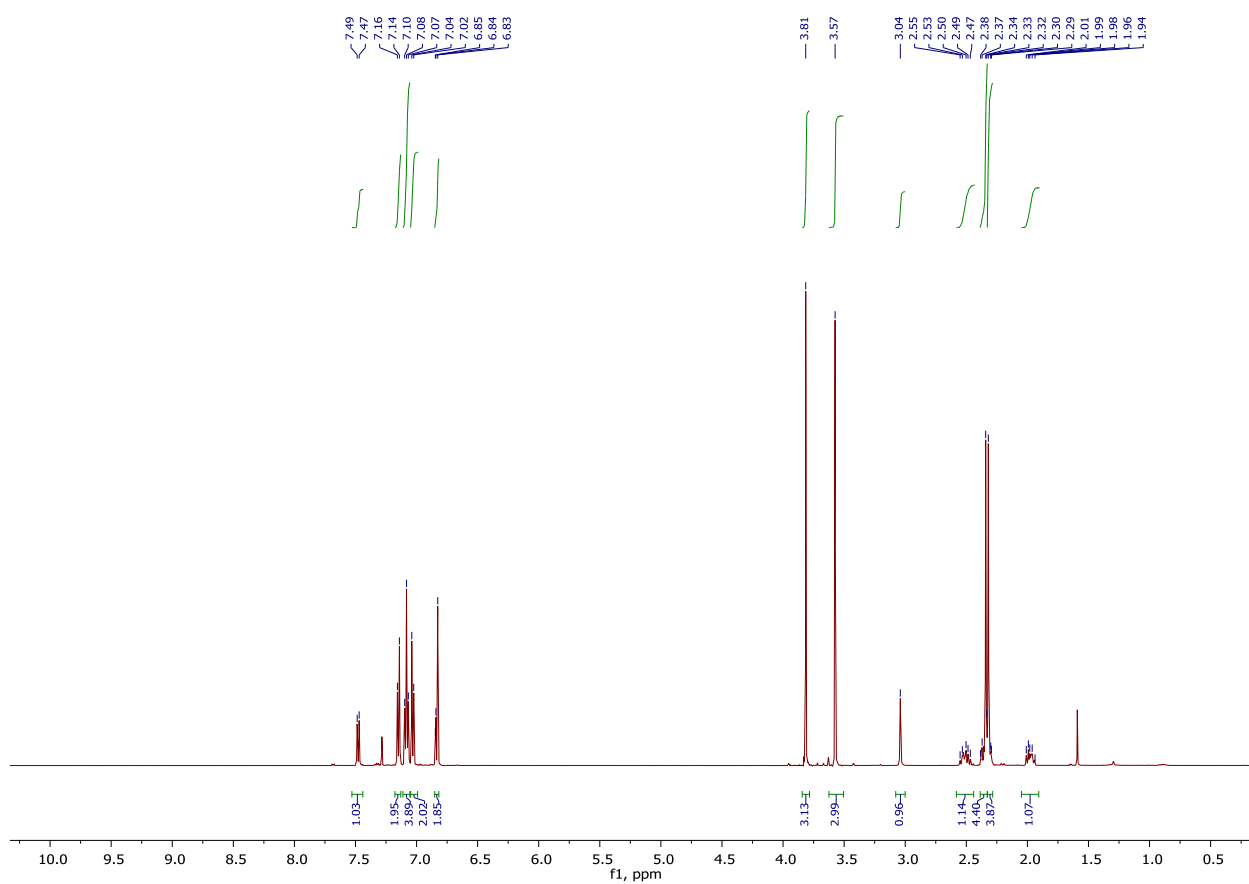

<sup>1</sup>H spectrum of **4k** in CDCl<sub>3</sub>

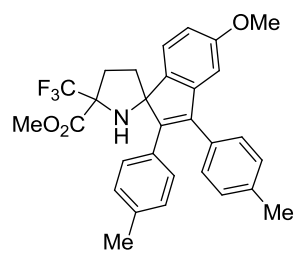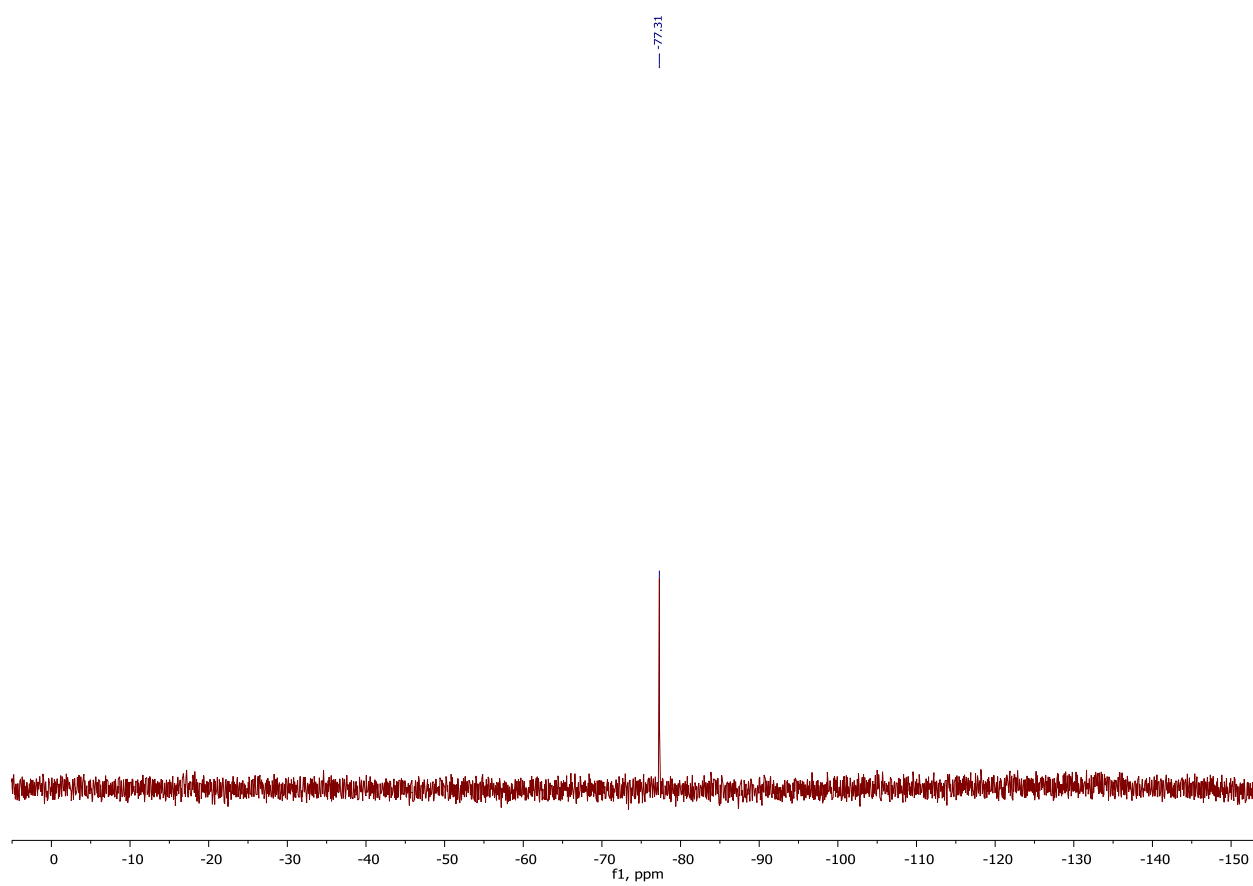

$^{19}\text{F}$  spectrum of **4k** in  $\text{CDCl}_3$

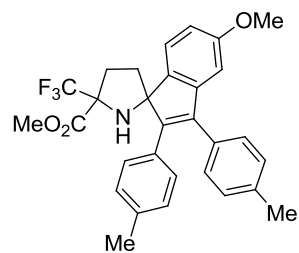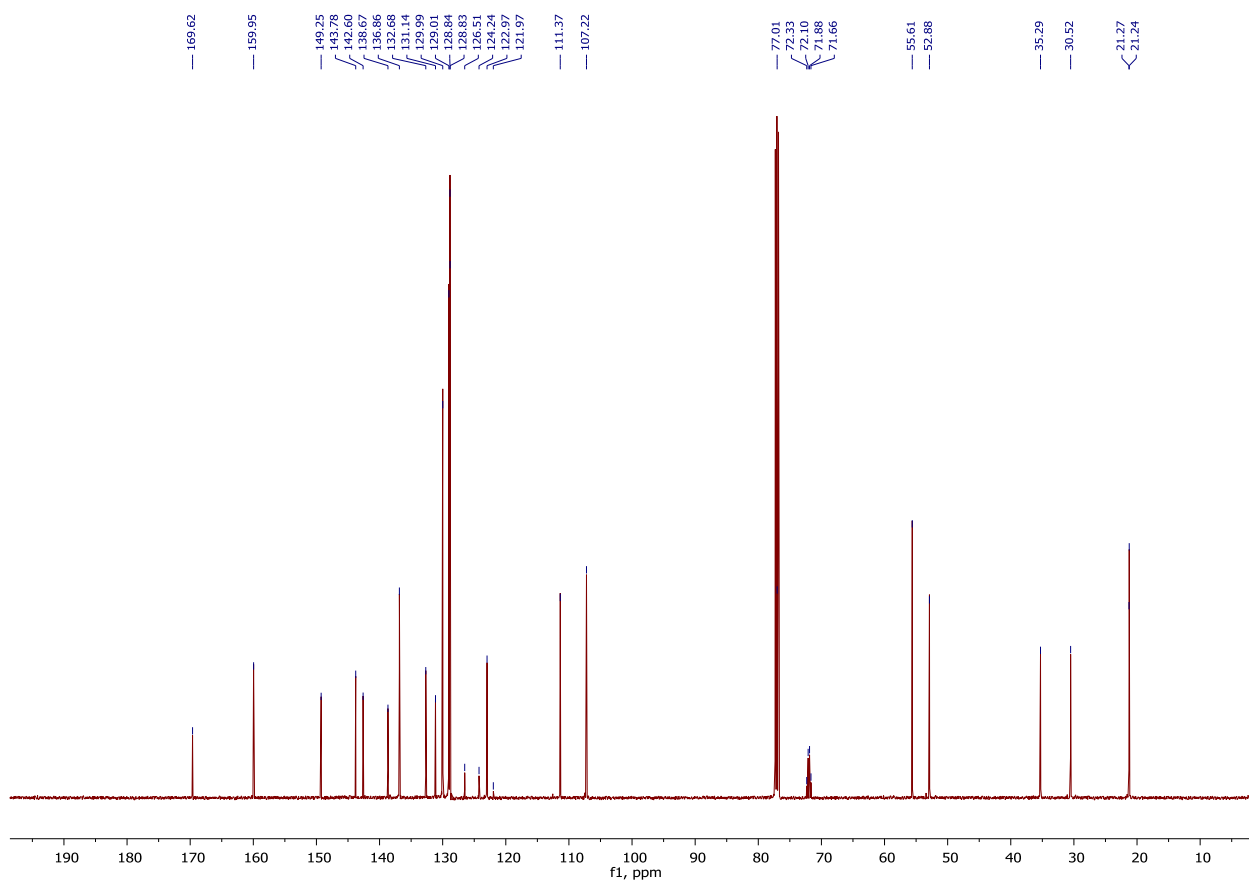

$^{13}\text{C}$  spectrum of **4k** in  $\text{CDCl}_3$

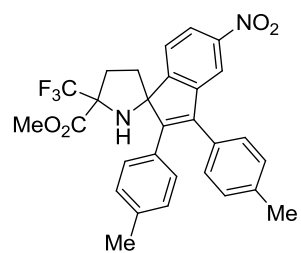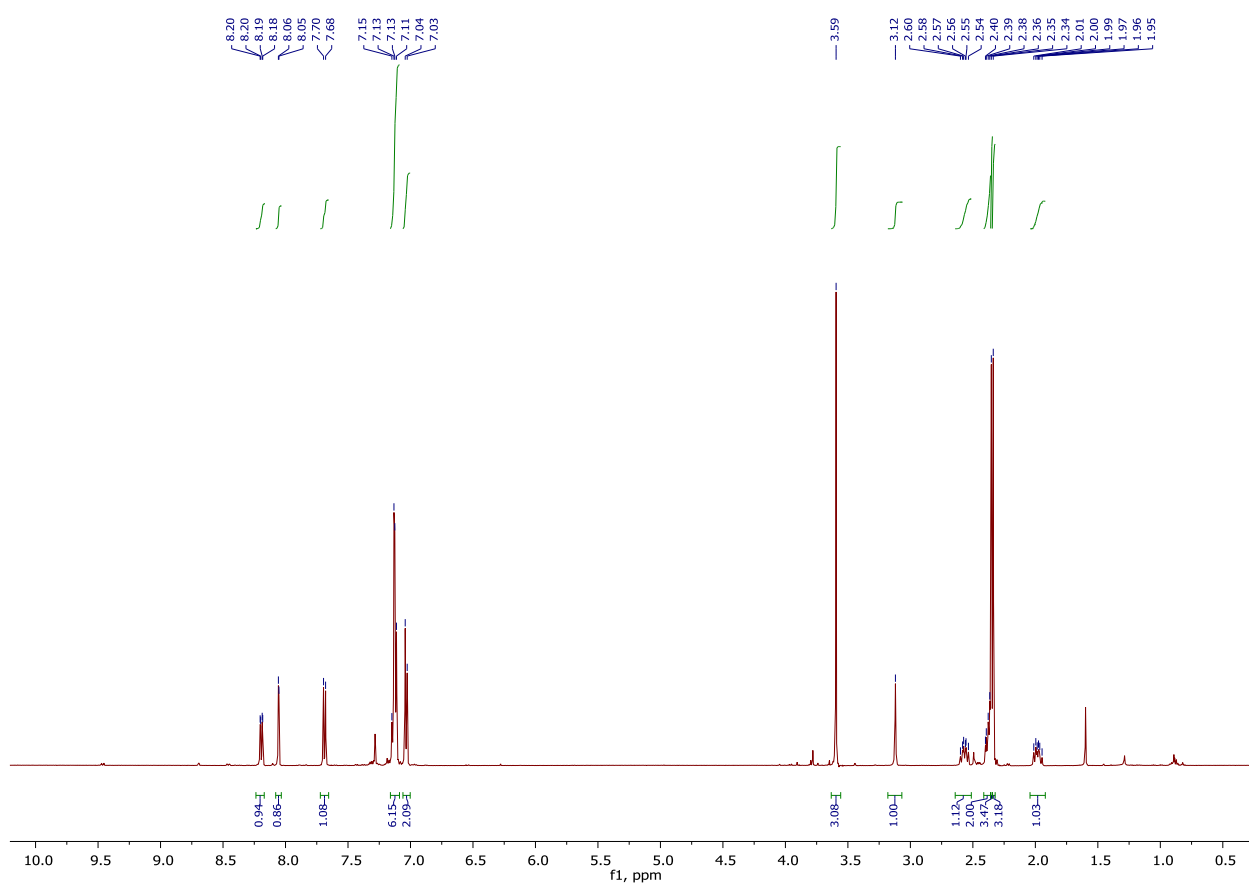

$^1\text{H}$  spectrum of **4l** in  $\text{CDCl}_3$

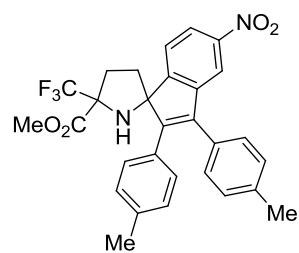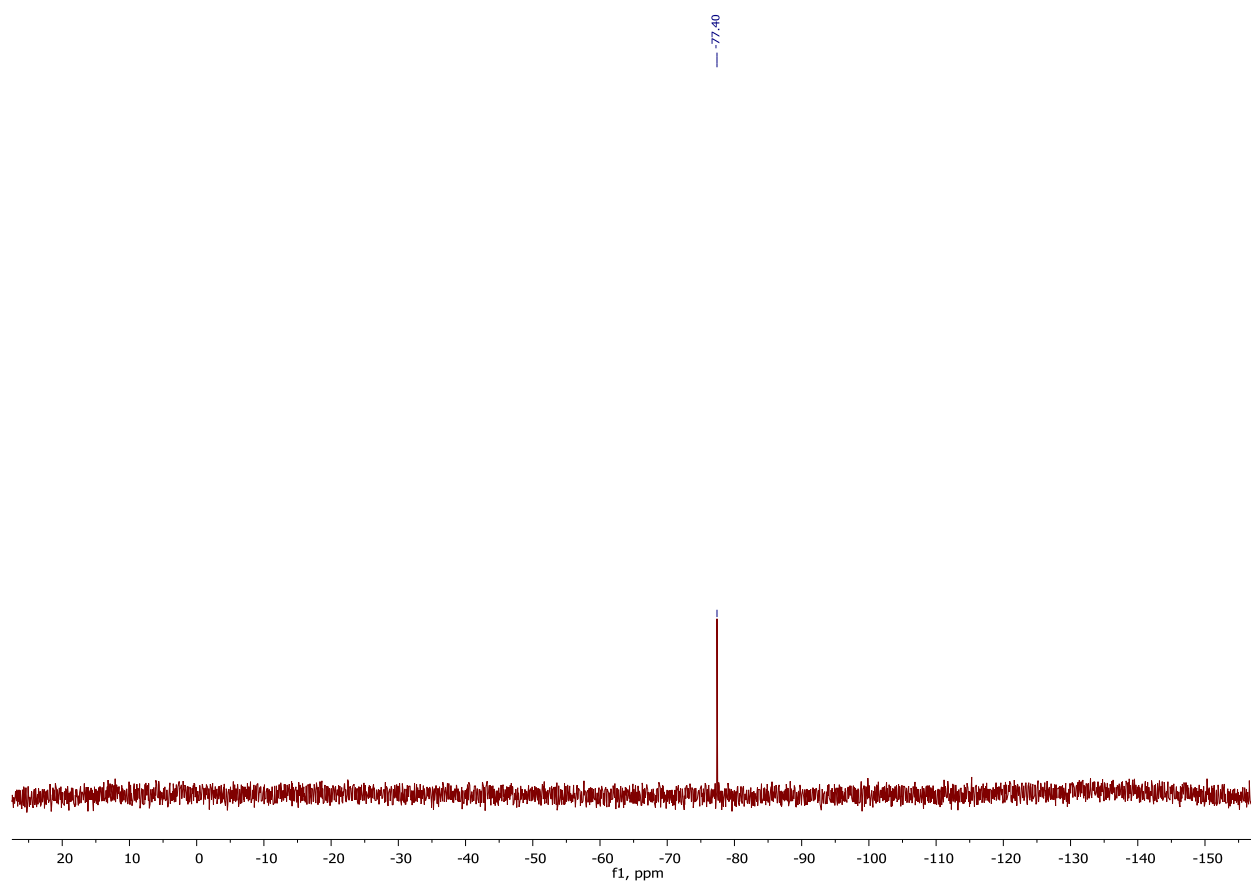

$^{19}\text{F}$  spectrum of **4l** in  $\text{CDCl}_3$

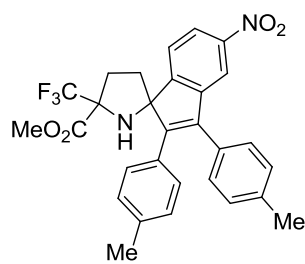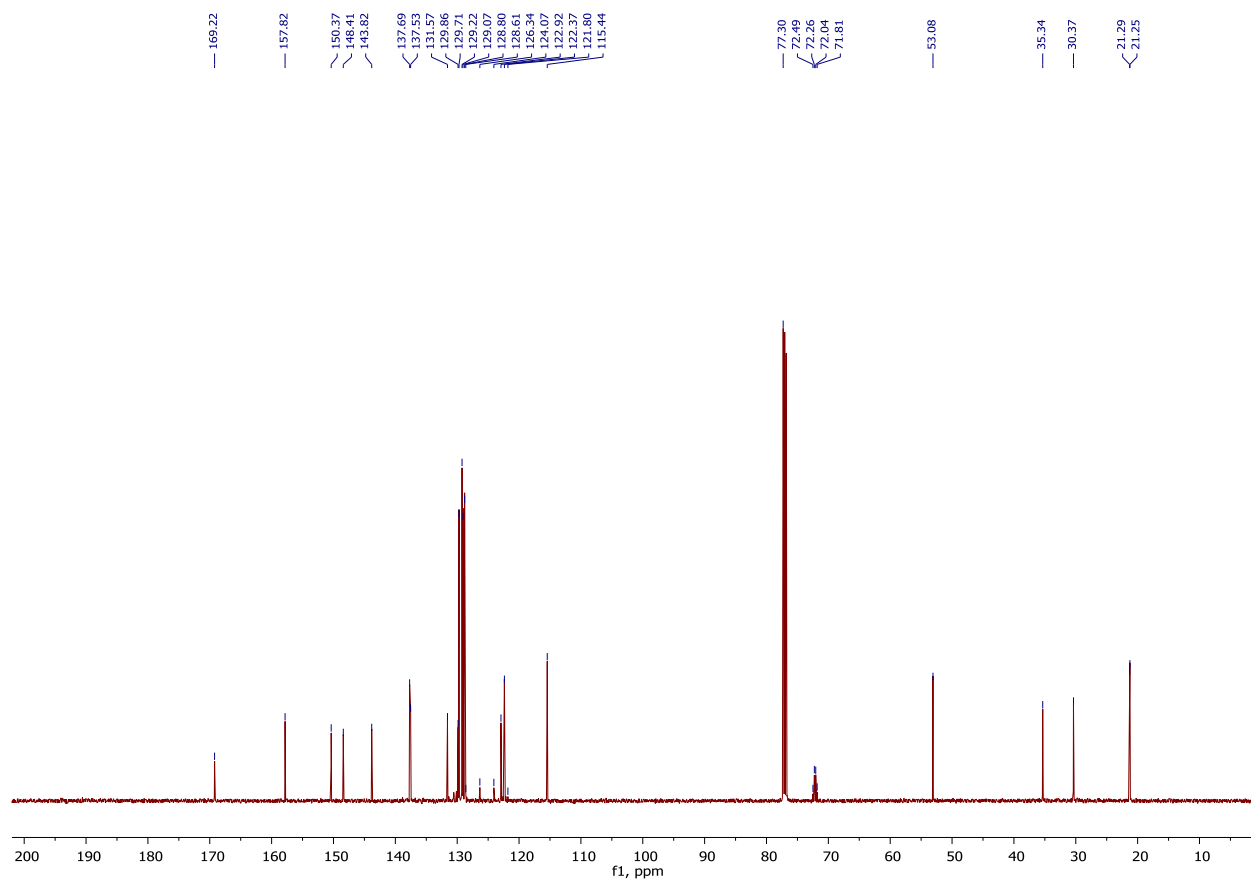

$^{13}\text{C}$  spectrum of **4l** in  $\text{CDCl}_3$

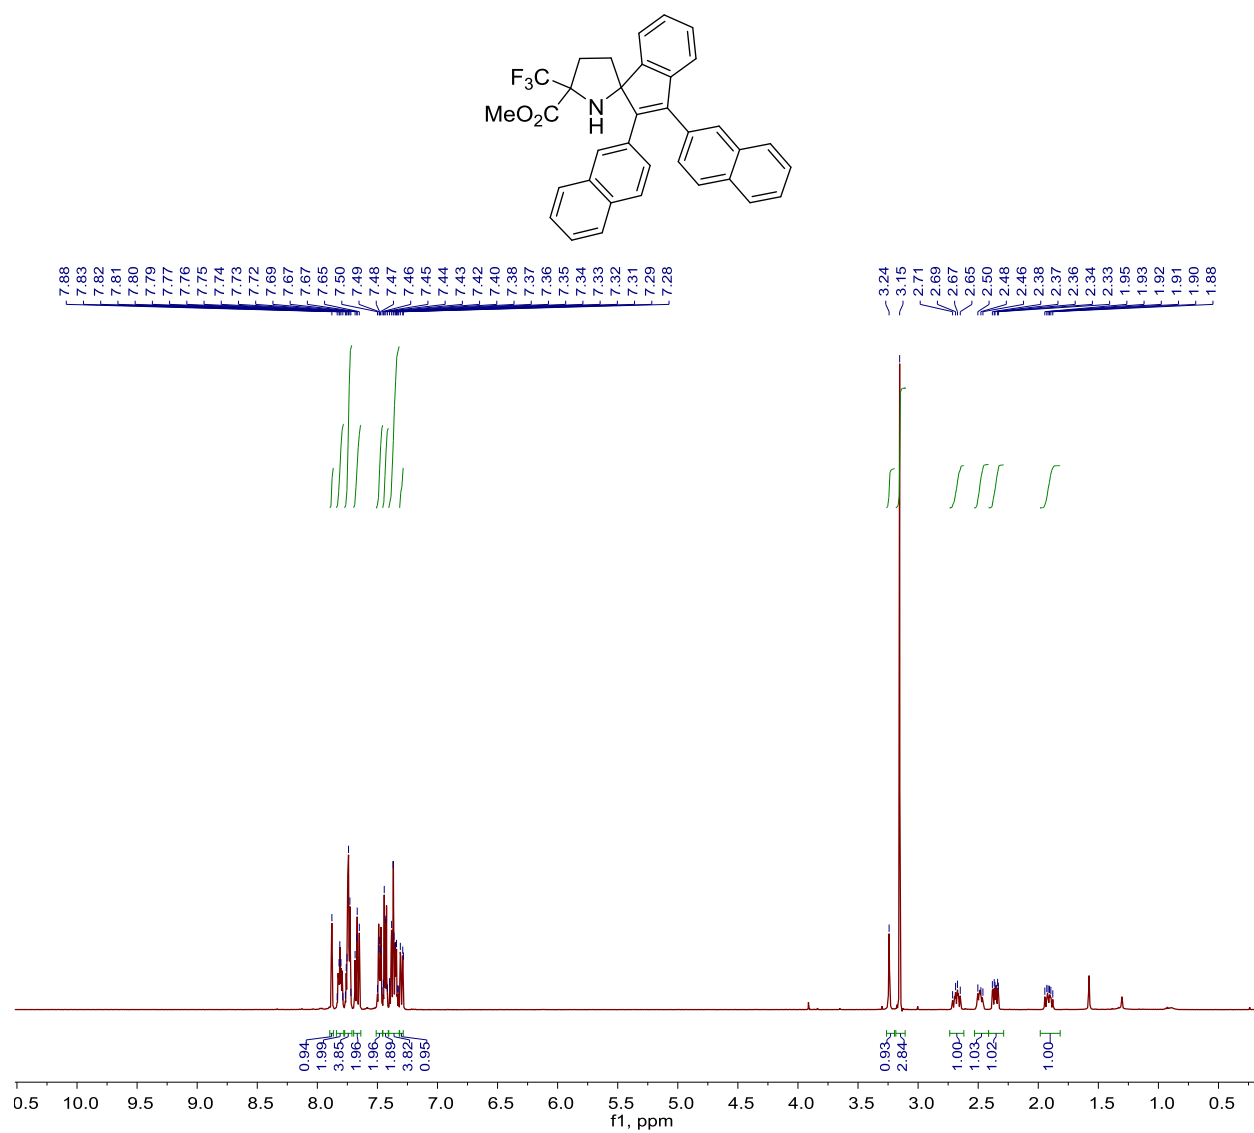

<sup>1</sup>H spectrum of **4m** in CDCl<sub>3</sub>

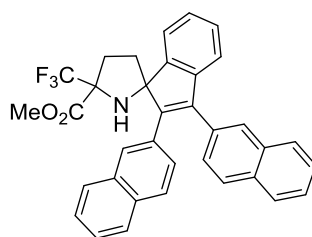

— -77.31

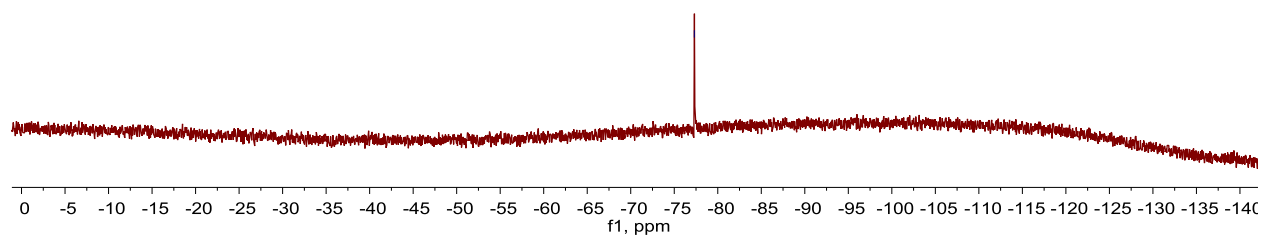

$^{19}\text{F}$  spectrum of **4m** in  $\text{CDCl}_3$

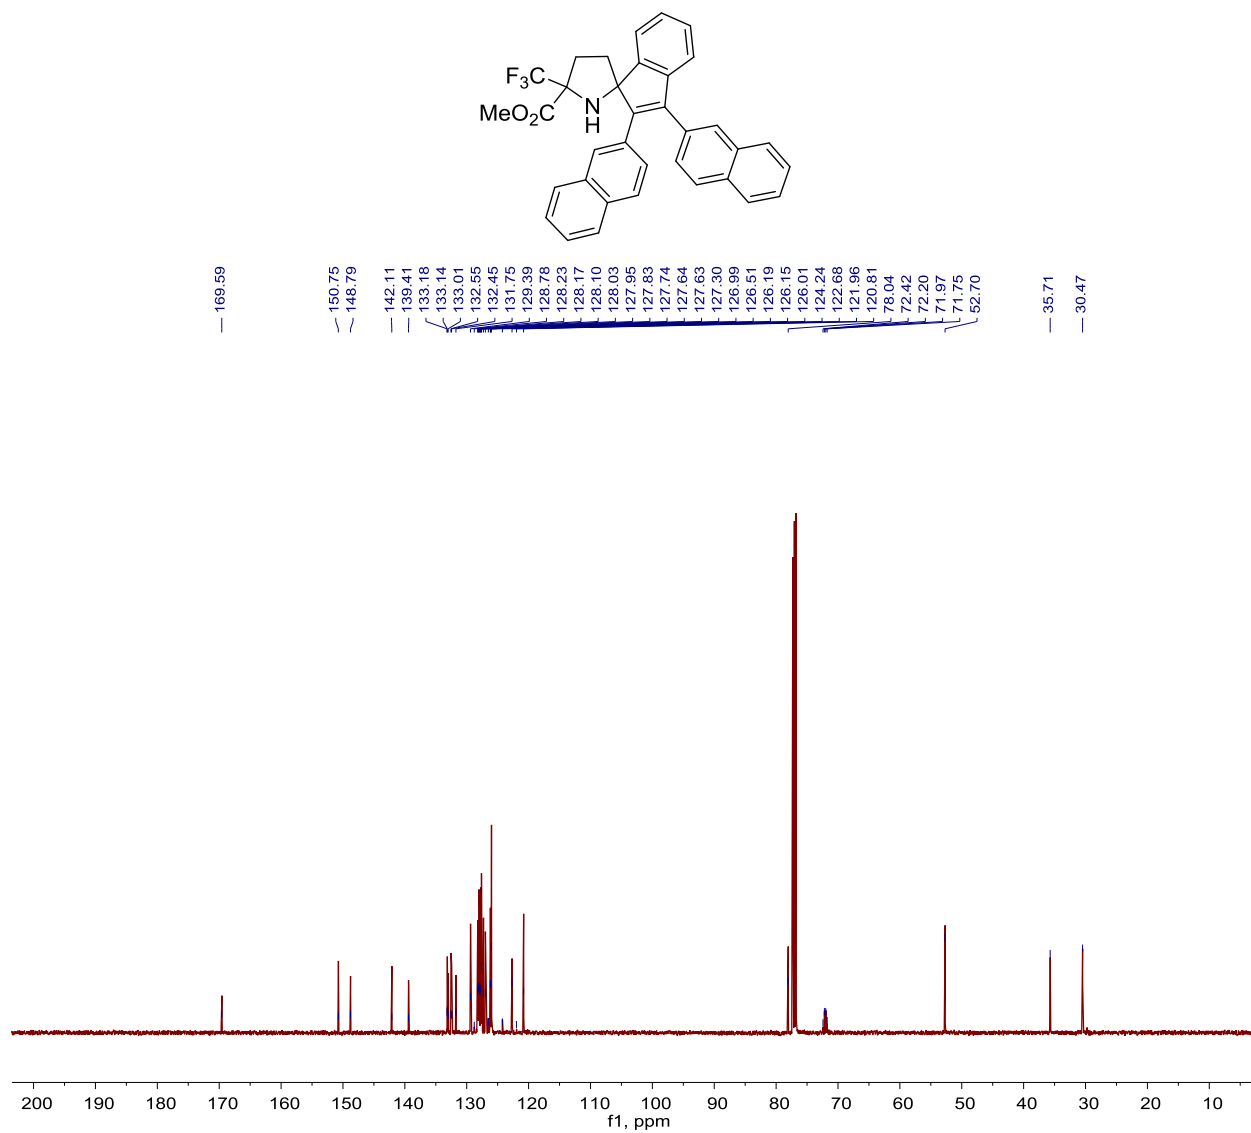

$^{13}\text{C}$  spectrum of **4m** in  $\text{CDCl}_3$

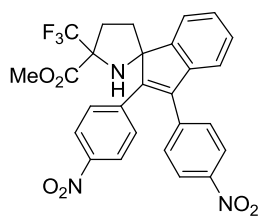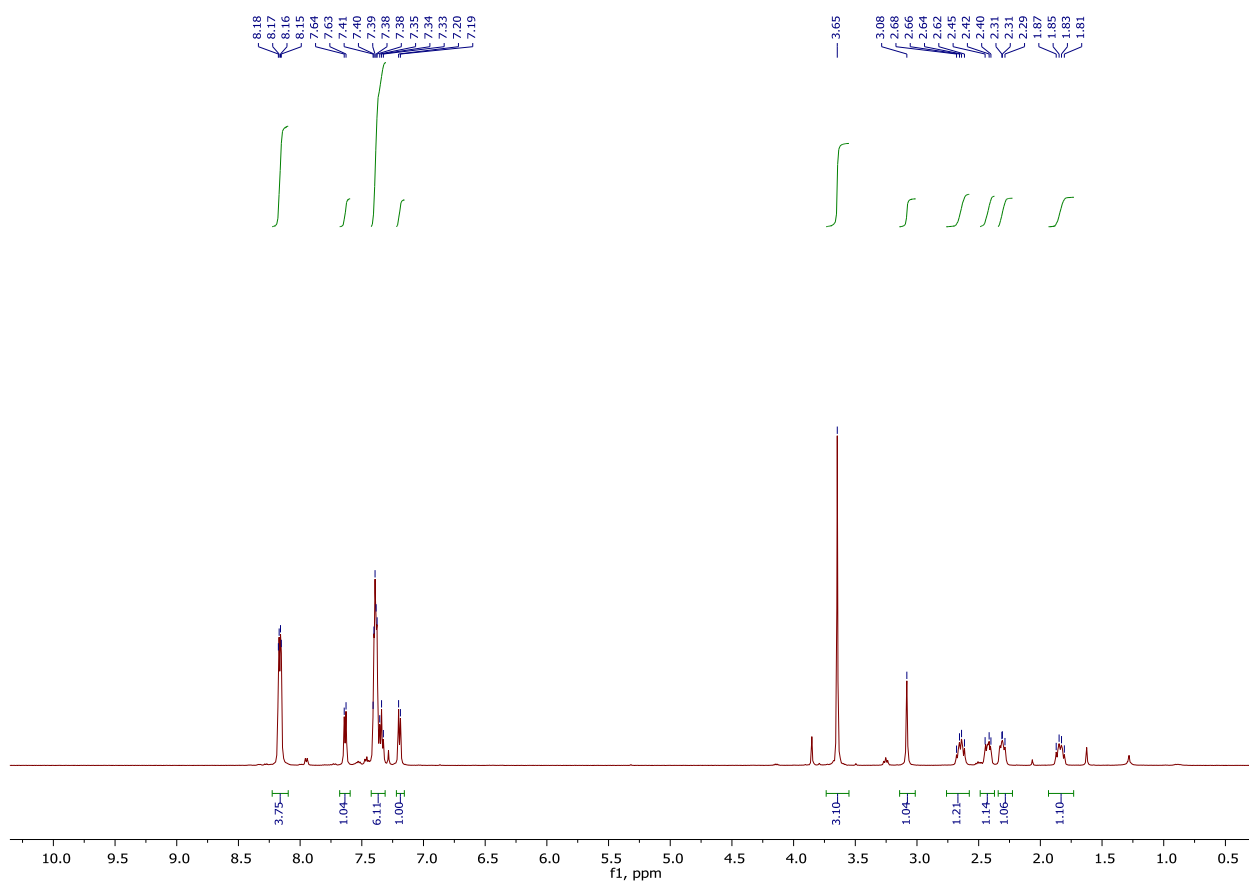

<sup>1</sup>H spectrum of **4n** in CDCl<sub>3</sub>

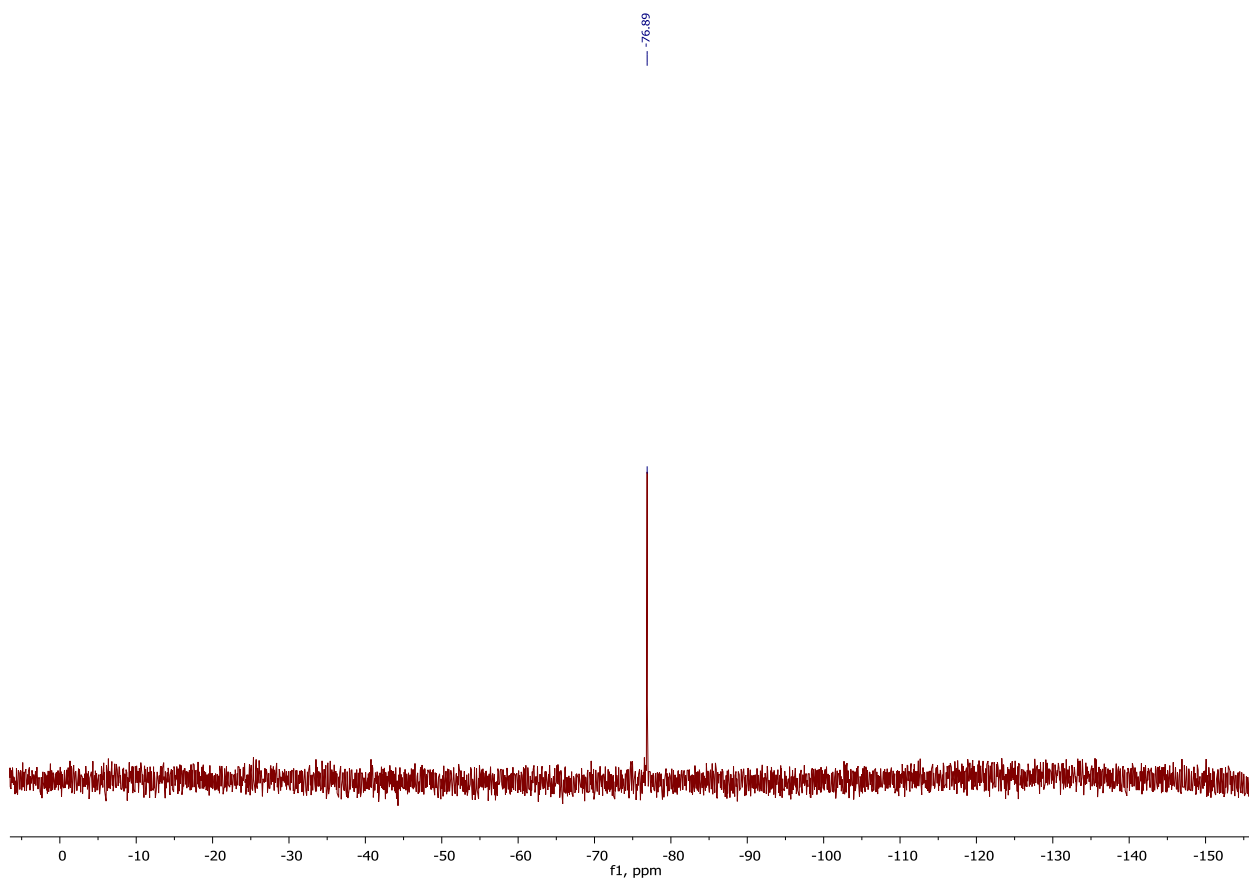

$^{19}\text{F}$  spectrum of **4n** in  $\text{CDCl}_3$

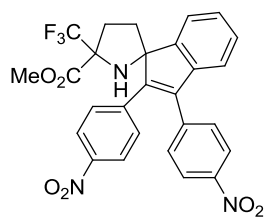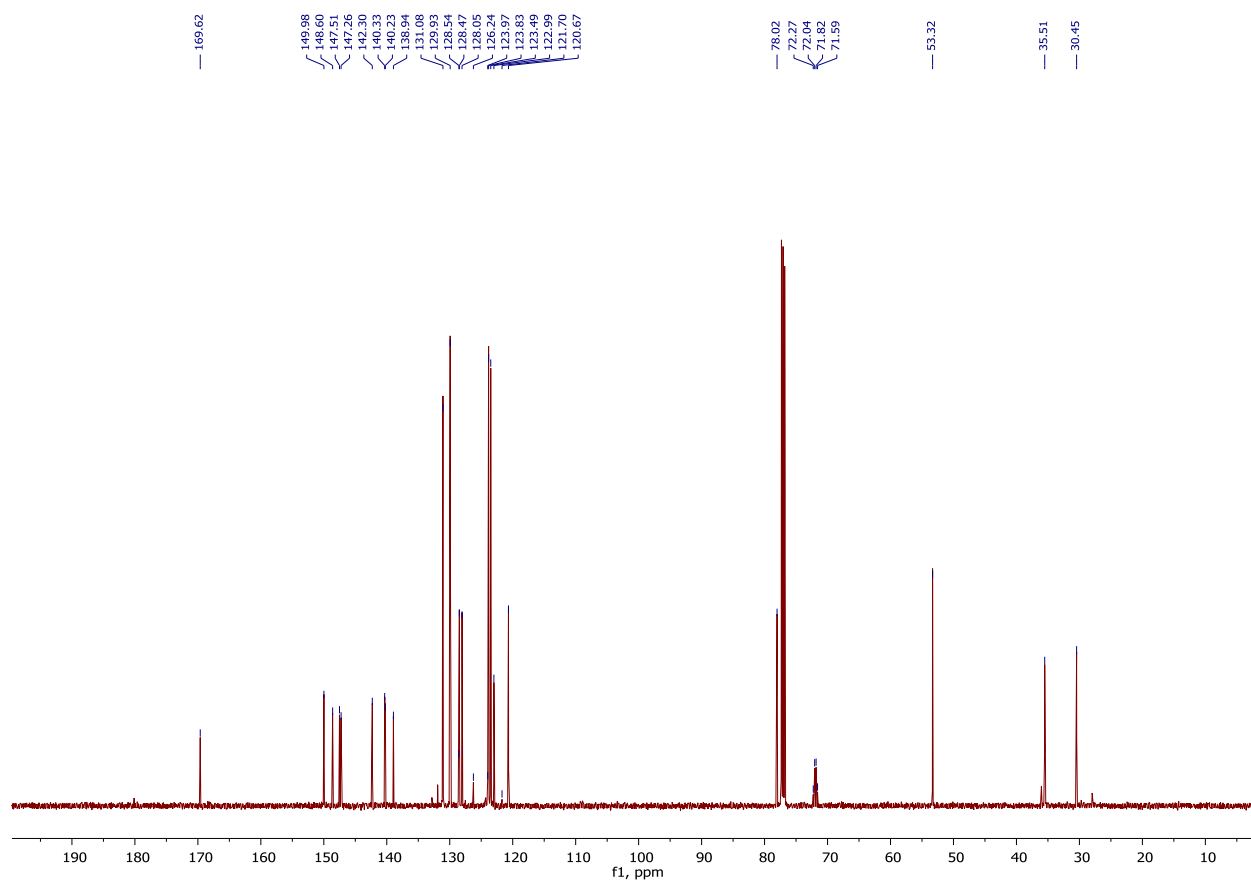

$^{13}\text{C}$  spectrum of **4n** in  $\text{CDCl}_3$

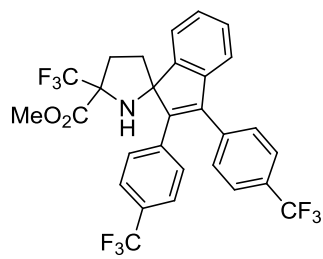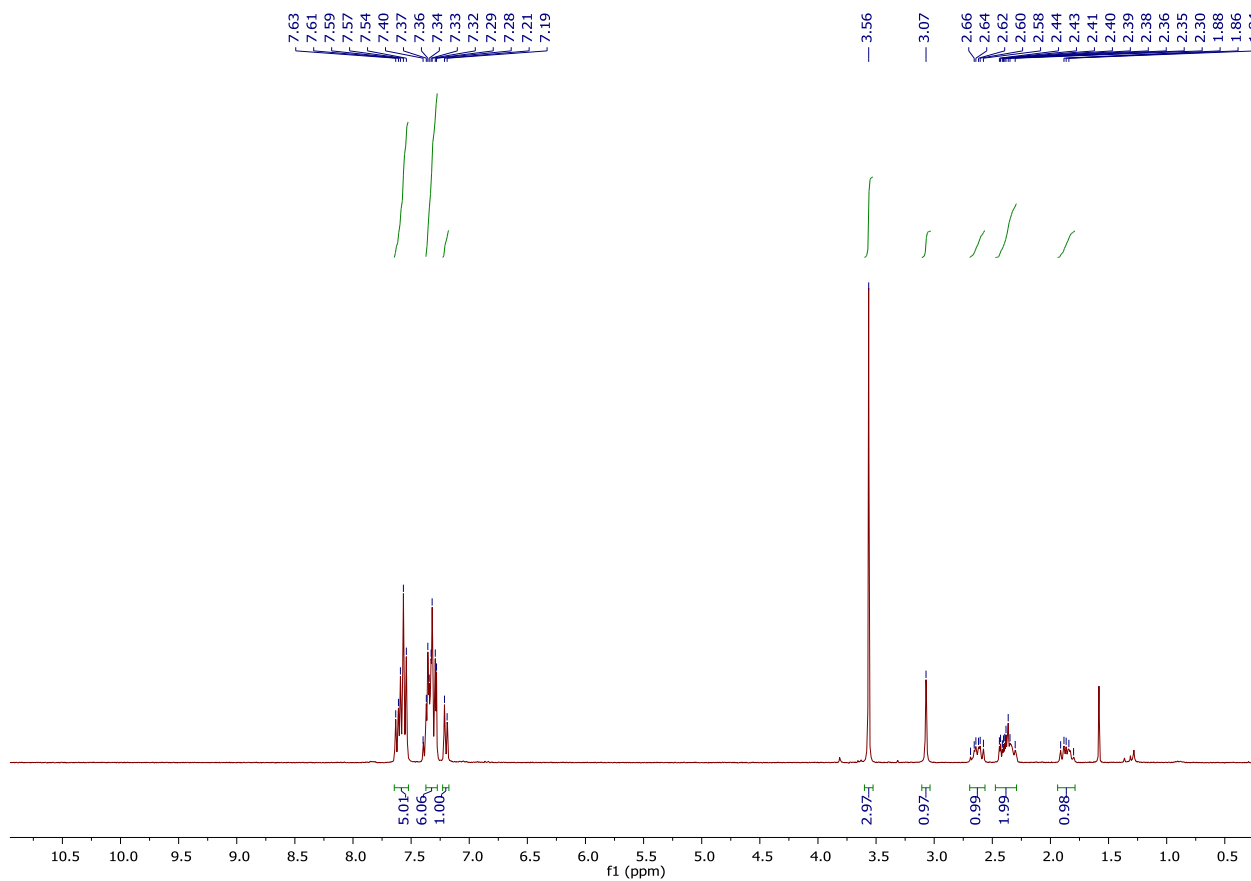

<sup>1</sup>H spectrum of **4o** in CDCl<sub>3</sub>

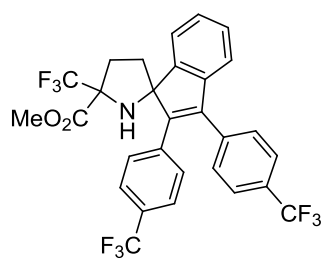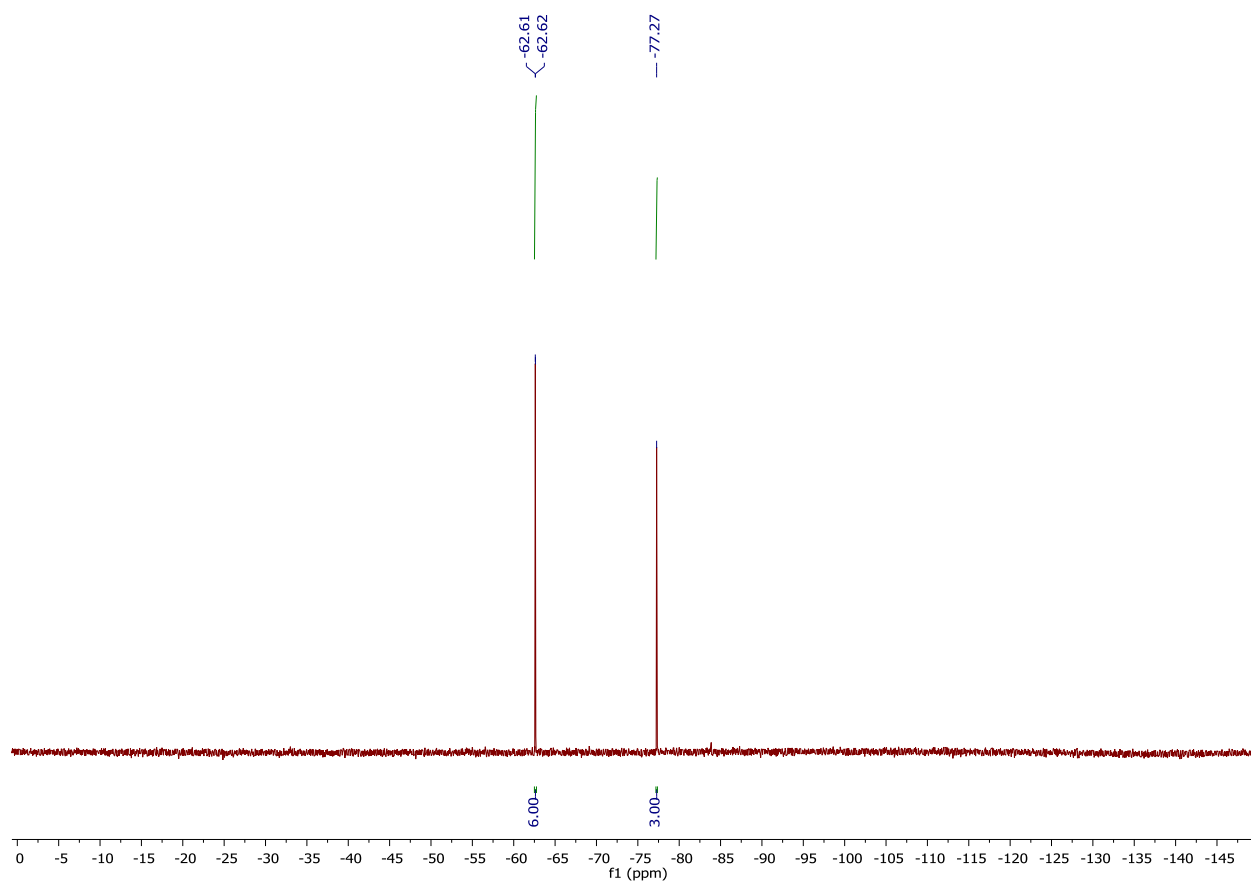

$^{19}\text{F}$  spectrum of **4o** in  $\text{CDCl}_3$

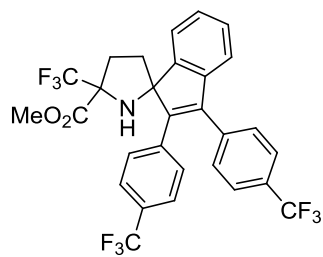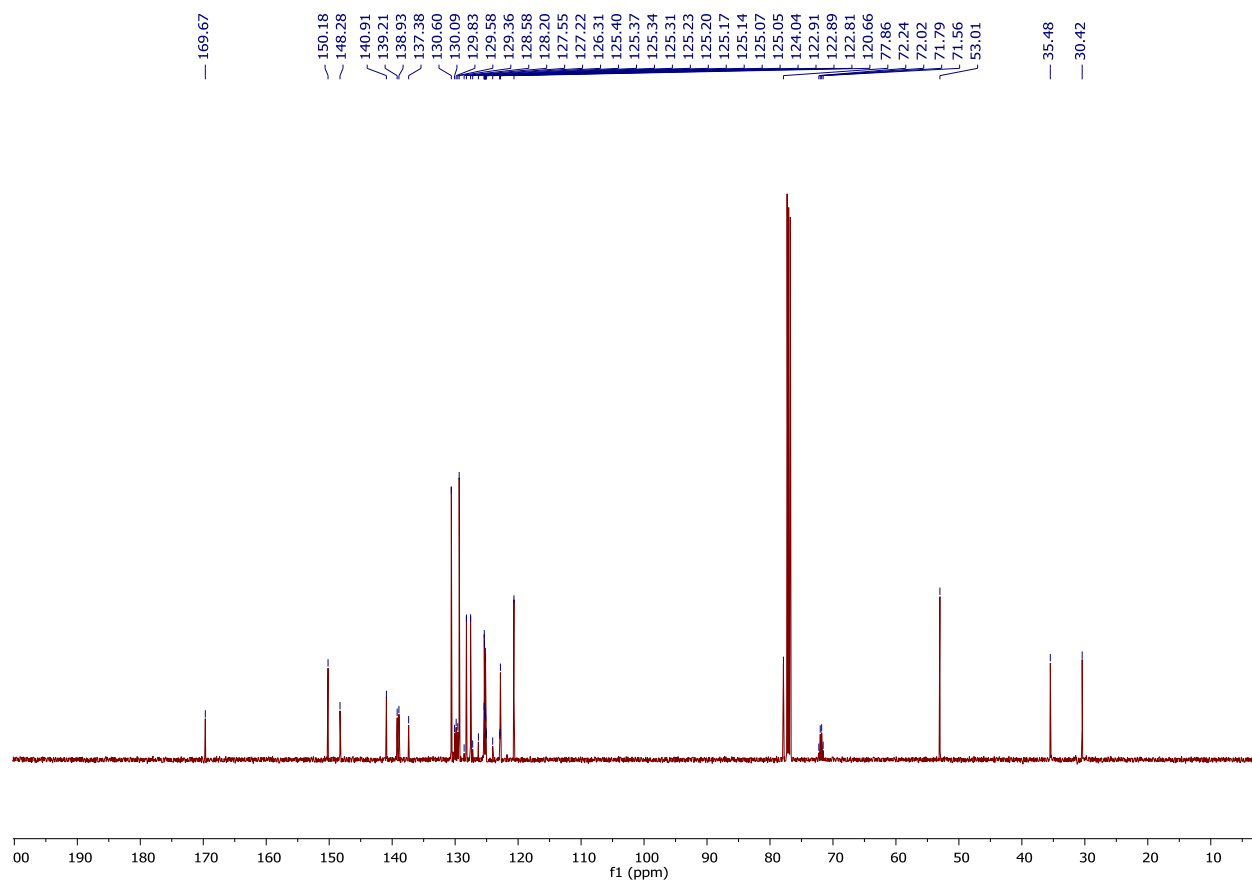

$^{13}\text{C}$  spectrum of **4o** in  $\text{CDCl}_3$

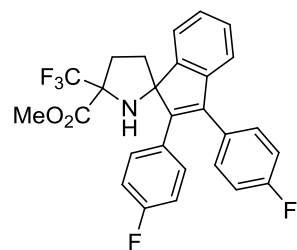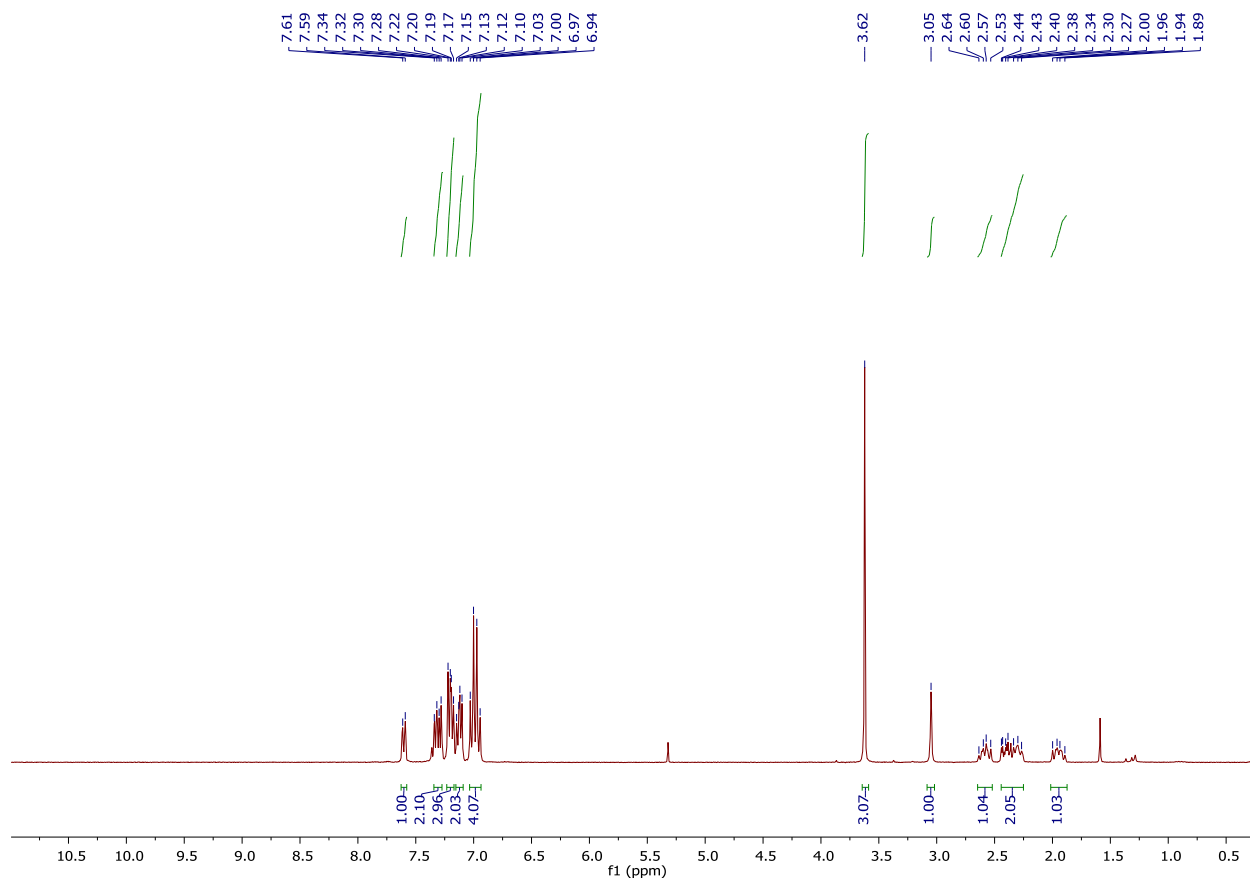

<sup>1</sup>H spectrum of **4p** in CDCl<sub>3</sub>

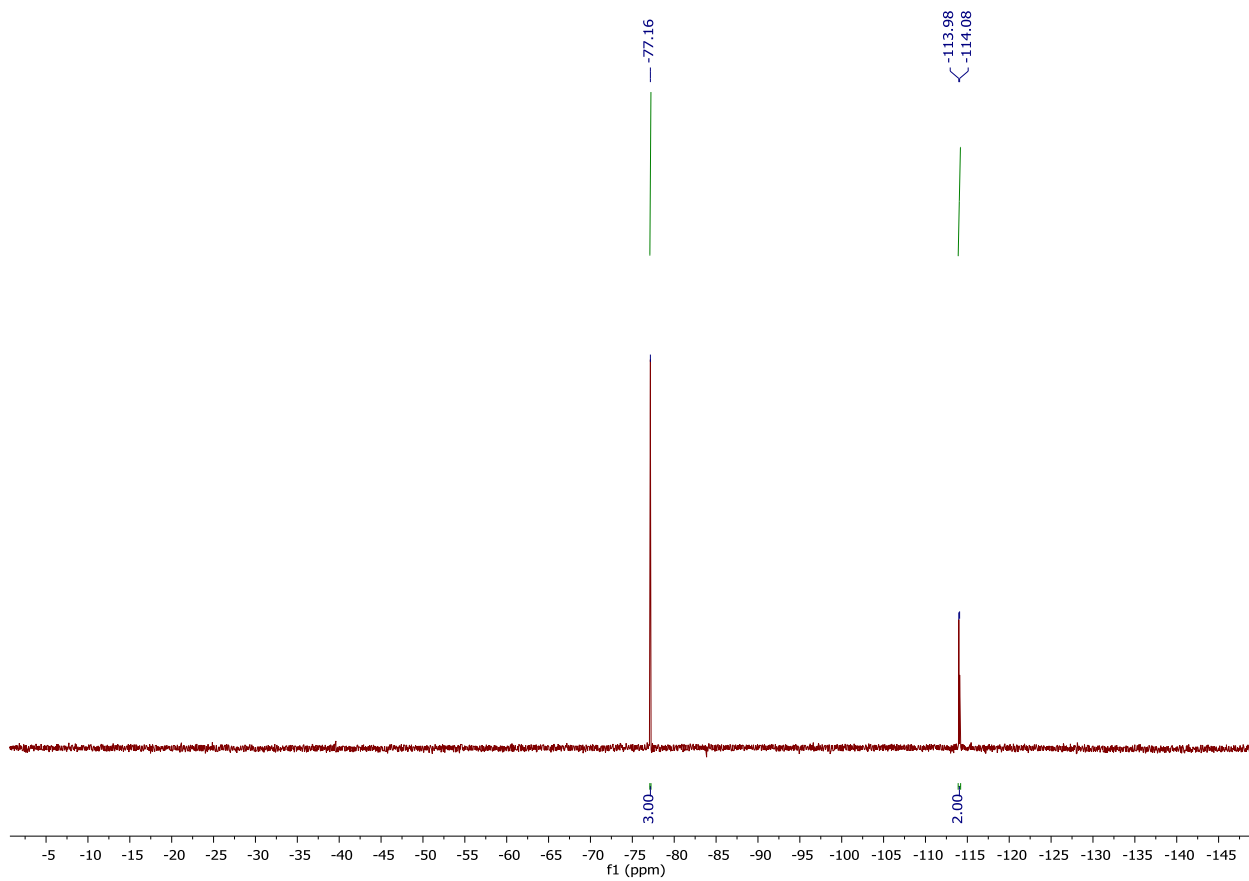

$^{19}\text{F}$  spectrum of **4p** in  $\text{CDCl}_3$

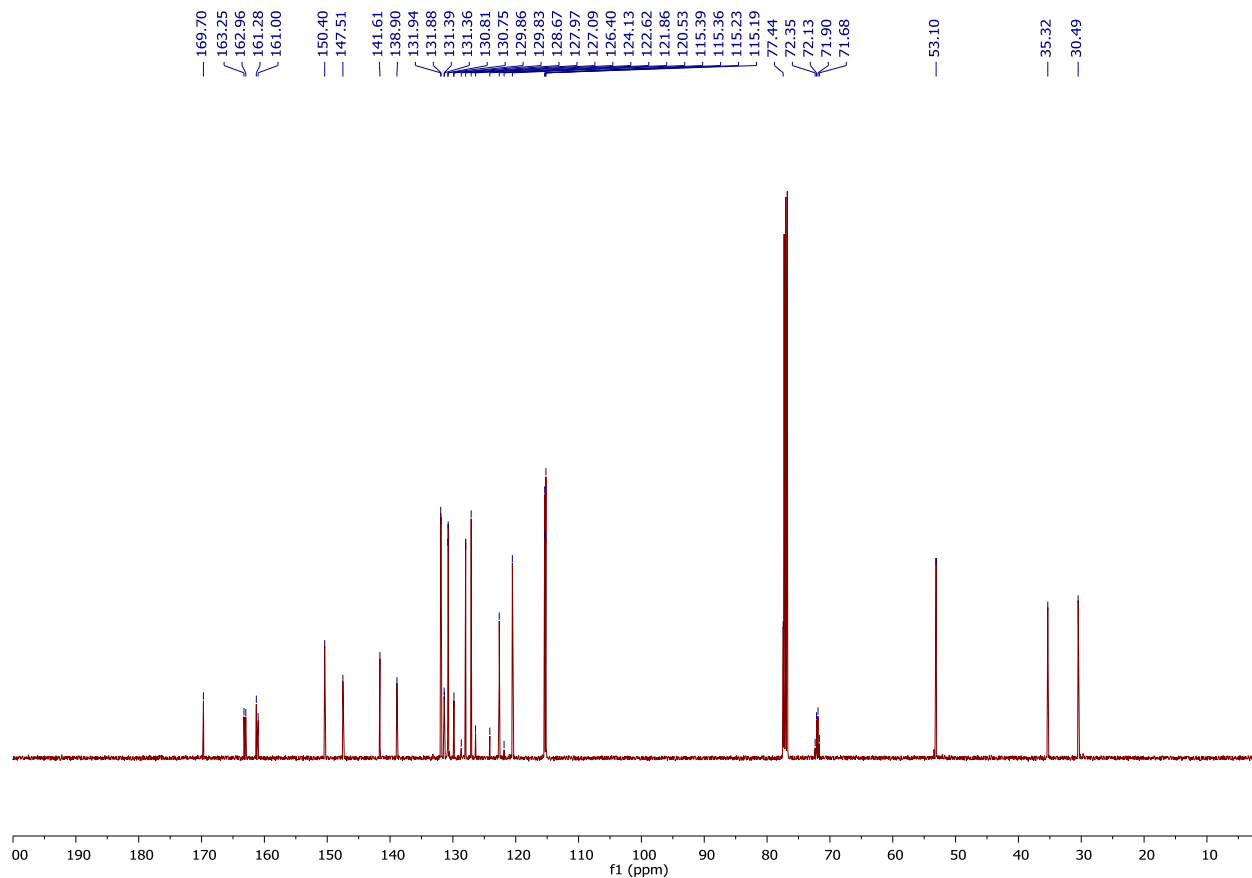

$^{13}\text{C}$  spectrum of **4p** in  $\text{CDCl}_3$

### 3. HPLC-HRMS data for 4a

High-resolution mass spectra were recorded on a Bruker Daltonics micrOTOF-Q II device (electrospray ionization). Measurements were carried out in positive ion mode under the following conditions: spray capillary voltage 4500 V; the mass scanning range  $m/z$  50–3000 Da; external calibration (Electrospray Calibrant Solution, Fluka); nebulizer pressure 04 bar; flow rate  $3 \mu\text{l} \cdot \text{min}^{-1}$ ; nebulizer gas—nitrogen ( $6.0 \text{ l} \cdot \text{min}^{-1}$ ); and interface temperature  $180^\circ\text{C}$ . Samples were injected into the spray chamber of the mass spectrometer from an Agilent 1260 liquid chromatograph equipped with an Agilent Poroshell 120 EC-C18 column ( $3.0 \times 50 \text{ mm}$ ;  $2.7 \mu\text{m}$ ); the flow rate was  $0.2 \text{ ml min}^{-1}$ ; the samples of compounds were loaded to an high-performance liquid chromatography (HPLC) chromatograph from acetonitrile solution and eluted in the following gradient of acetonitrile (A) in water: 0–6 min – 40%-85% A, 6–7.5 min – 85% A, 7.5–8 min – 85%-40% A, 8–10 min – 40% A.

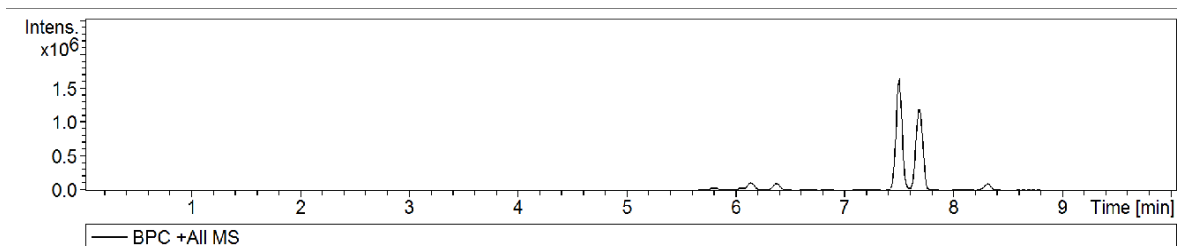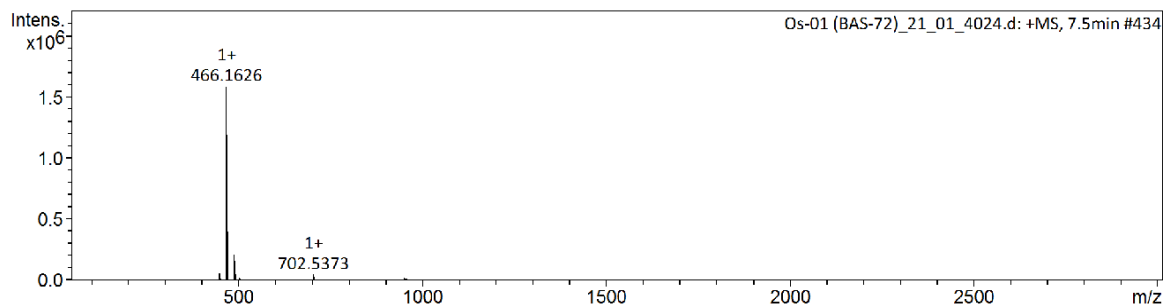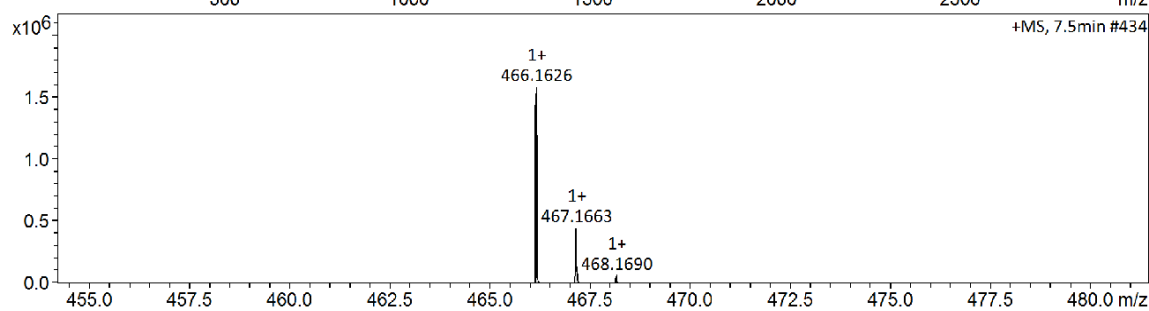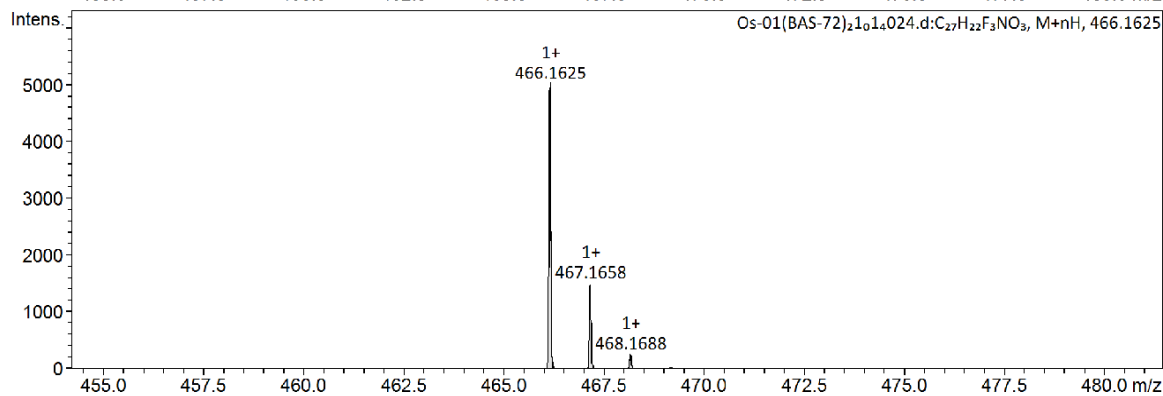

S 50
